1 **Title:** Genome-wide Functional Characterization of Escherichia coli Promoters and  
2 Sequence Elements Encoding Their Regulation

3

4 **Authors:**

5 Guillaume Urtecho<sup>1,2\*</sup>, Kimberly D. Insigne<sup>3†</sup>, Arielle D. Tripp<sup>4</sup>, Marcia S. Brinck<sup>5</sup>, Nathan B. Lubock<sup>6</sup>,  
6 Christopher Acree<sup>7</sup>, Hwangbeom Kim<sup>6</sup>, Tracey Chan<sup>3</sup>, & Sriram Kosuri<sup>6,8,9</sup>

7

8 **Affiliations:**

9 <sup>1</sup> Molecular Biology Interdepartmental Doctoral Program, University of California, Los Angeles,  
10 CA, 90095, USA

11 <sup>2</sup> Department of Systems Biology, Columbia University, New York, NY, 10032, USA.

12 <sup>3</sup> Bioinformatics Interdepartmental Graduate Program, University of California, Los Angeles, CA 90095,  
13 USA

14 <sup>4</sup> Department of Molecular, Cell, and Developmental Biology, University of California, Los  
15 Angeles, CA, 90095, USA

16 <sup>5</sup> Department of Microbiology, Immunology, and Molecular Genetics, University of California, Los Angeles,  
17 Los Angeles, California, USA

18 <sup>6</sup> Department of Chemistry and Biochemistry, University of California, Los Angeles, CA 90095, USA

19 <sup>7</sup> Department of Molecular Physiology and Biophysics, Vanderbilt University, Nashville, TN, 37232 USA

20 <sup>8</sup> Molecular Biology Institute, University of California, Los Angeles, CA 90095, USA

21 <sup>9</sup> UCLA-DOE Institute for Genomics and Proteomics, Quantitative and Computational Biology Institute, Eli  
22 and Edythe Broad Center of Regenerative Medicine and Stem Cell Research, Jonsson Comprehensive  
23 Cancer Center, University of California, Los Angeles, CA 90095, USA

24

25 \*To whom correspondence should be addressed. Email: [gu2144@cumc.columbia.edu](mailto:gu2144@cumc.columbia.edu)

26

27 †The authors wish it to be known that, in their opinion, the first two authors should be regarded as joint  
28 First Authors.

29

30 **Summary:**

31

32 Despite decades of intense genetic, biochemical, and evolutionary characterizations of bacterial  
33 promoters, we lack the ability to identify or predict transcriptional activities of promoters using  
34 primary sequence. Even in simple, well-characterized organisms such as *E. coli* there is little  
35 agreement on the number, location, and strength of promoters. We use a genomically-encoded  
36 massively parallel reporter assay to perform the first full characterization of autonomous  
37 promoter activity across the *E. coli* genome. We measure promoter activity of >300,000  
38 sequences spanning the entire genome and map 2,228 promoters active in rich media.  
39 Surprisingly, 944 of these promoters were found within intragenic sequences and are associated  
40 with conciliatory sequence adaptations by both the protein-coding regions and overlapping RNAP  
41 binding sites. Furthermore, we perform a scanning mutagenesis of 2,057 promoters to uncover  
42 sequence elements regulating promoter activity, revealing 3,317 novel regulatory elements.  
43 Finally, we show that despite these large datasets and modern machine learning algorithms,  
44 predicting endogenous promoter activity from primary sequence is still challenging.

45

46

## 47 Introduction

48

49 In 1961, François Jacob and Jacques Monod outlined the concept of the bacterial promoter  
50 derived from an accumulation of genetic and biochemical studies of metabolic regulation in  
51 *Escherichia coli*<sup>1</sup>. Bacterial promoters have since become a foundation for understanding  
52 molecular biology and gene regulation, with countless studies probing their genetic, evolutionary,  
53 structural, thermodynamic and kinetic properties<sup>2-5</sup>. Several model promoters such as the *lac*, *trp*,  
54 and phage promoters have been the subject of in-depth mechanistic studies for how RNA  
55 polymerase (RNAP) recognizes promoter sequences, as well as the stepwise process to initiate  
56 transcription<sup>6-8</sup>. In addition, many transcription factors have been described in similar detail,  
57 revealing the processes through which these proteins modulate the behavior of RNAP and activity  
58 of the promoter<sup>4,9-11</sup>. The majority of the binding motifs for these transcription factors have been  
59 studied at high resolution using modern methods<sup>12-15</sup>. In short, the myriad components that  
60 define *E. coli* promoter function have been extensively cataloged and characterized, establishing  
61 them as one of the most well-understood systems in molecular biology.

62

63 Despite this extensive knowledge, we still cannot answer many simple and fundamental  
64 questions about *E. coli* promoters. For example, how many active promoters exist in *E. coli* at a  
65 given growth condition? To what extent is promoter regulation responsible for protein level  
66 remodeling during environmental changes? Given a sequence, can we predict whether a promoter  
67 is encoded within it as well as its strength and/or regulation? Answers to these questions remain  
68 difficult for many reasons. Although the consensus sequences for RNAP recognition motifs have  
69 been known for decades, a simple search of the genome based on these motifs yields many false  
70 positives. In fact, within a region, there are often sequences closer to the RNAP recognition motifs  
71 than the actual functional promoter<sup>16,17</sup>. Experimental efforts to identify promoters using 5' RNA-  
72 Seq have found tens of thousands of putative transcription start sites (TSSs) that presumably  
73 mark sites with functional promoter activity, however, there is little overlap between studies<sup>18,19</sup>.  
74 Furthermore, although many *E. coli* promoters have been verified with strong biochemical  
75 evidence<sup>20</sup>, identifying the cis-regulatory elements responsible for their activity is challenging. As  
76 a consequence, roughly two-thirds of the 2,565 reported *E. coli* operons do not contain any  
77 transcription factor binding site annotations<sup>20,21</sup>. Finally, aside from a handful of thoroughly-  
78 studied promoter sequences, we are still unable to quantitatively predict the activity or behavior  
79 of promoters in the context of sequence perturbations such as moving, mutating, or removing  
80 transcription factor binding sites.

81

82 There are several confounding factors which make it difficult to accurately gauge if a sequence  
83 can confer promoter activity. First, recent work has shown that promoter activity varies depending  
84 on location in the genome due to factors such as variance in chromosomal copy number<sup>22-24</sup>, the  
85 distribution of transcription factors within a cell<sup>25,26</sup>, and chromatin accessibility<sup>27-29</sup> masking the  
86 effects of cis-regulatory elements. Efforts to normalize these effects have utilized reporters on  
87 high copy number plasmids that can saturate endogenous transcriptional machinery<sup>30</sup>. Second,  
88 inferring promoter strength from endogenous transcript production is problematic because these  
89 transcripts often contain sequences that alter their processing and stability independent of the

90 promoter sequence<sup>31,32</sup>. Third, multiple promoters within close proximity, whether co-directional  
91 or opposing, can affect each other's strength and resulting transcription through mechanisms  
92 such as RNAP collisions and antisense RNA<sup>33-36</sup>. Finally, not all sequences that initiate RNA  
93 transcription are capable of producing mature and translatable RNA<sup>37</sup>.

94  
95 Here we investigated promoter regulation in *E. coli* using a massively-parallel reporter assay  
96 (MPRA) designed to isolate promoter activity from other confounding factors influencing genetic  
97 regulation<sup>38</sup>. We measured promoter activity at 17,189 reported TSSs and found that a majority  
98 are not autonomous promoter sequences capable of gene transcription. We then measured  
99 promoter activity of 321,123 sheared genomic fragments spanning both strands of the *E. coli*  
100 genome (8.5x coverage) to elucidate the promoter landscape in rich and minimal media. We then  
101 systematically tiled these regions to precisely map promoter boundaries, revealing many regions  
102 with multiple promoters in close proximity, as well as many antisense promoters within genes  
103 that shape both codon usage and transcription levels. To characterize sequence motifs encoding  
104 promoter activity, we performed systematic mutagenesis of 2,057 active promoters and identified  
105 cis-regulatory elements affecting promoter activity. With this approach, we characterized the  
106 regulatory effects of 568 transcription factor binding sites reported by RegulonDB as well as 2,583  
107 novel sites, thereby providing functionally annotated profiles for promoters driving expression in  
108 rich LB media for 1,158 of the 2,565 operons in *E. coli*. Lastly, we trained several machine learning  
109 models on these datasets to better understand the features that may be used to classify *E. coli*  
110 promoter sequences and quantitatively predict promoter function from sequence.

111

## 112 **Results**

113

### 114 **Functional characterization of 17,635 previously reported *E. coli* promoters reveals many are** 115 **transcriptionally inactive**

116

117 We first sought to validate promoters and TSSs identified by several genome-wide studies. We  
118 assembled previously reported TSSs from three sources: the RegulonDB *E. coli* database<sup>20</sup> (8,486  
119 TSSs), a directional RNA-Seq study by Wanner et. al<sup>18</sup> (2,123 TSSs), and a RNA-Seq study by  
120 Thomason et. al<sup>19</sup> (14,868 TSSs). These three sources identify 23,798 unique TSSs active during  
121 log-phase growth in rich media with little agreement regarding the location of TSSs between  
122 studies and only 93 exact matches shared between all three (**Figure 1A**). Even when we collapsed  
123 clusters of TSSs within 20 bp of each other to the most upstream TSS to minimize redundancy,  
124 17,635 unique TSSs remained. These TSSs are likely some combination of true promoters and  
125 false positives due to RNA processing, transcriptional noise, or experimental and computational  
126 artifacts.

127

128 To see if these TSS regions could drive gene expression of a transcriptional reporter, we used a  
129 genomic MPRA we developed<sup>38</sup> to quantitatively measure the autonomous promoter activity of  
130 17,635 TSSs (**Figure 1B**). This system allows for single integration of large reporter libraries into  
131 a defined locus. The promoter activity reporter is insulated by multiple transcriptional terminators  
132 and the reporter transcript contains a RiboJ ribozyme sequence upstream of the RBS that

133 standardizes the transcript produced. For each TSS, we synthesized oligonucleotides spanning  
134 120 bp upstream to 30 bp downstream of the TSS, which encodes the majority of promoter  
135 activity driving expression at a given TSS<sup>39</sup>. We included 96 well-characterized promoters from  
136 the BioBricks registry<sup>40</sup> designed to span a wide range of expression levels to serve as positive  
137 controls. We also included 500 negative controls that were selected 150 bp sequences from the  
138 *E. coli* genome. Our criteria for selecting these sequences was that they are more than 200 bp  
139 from any TSS reported in the aforementioned studies. We engineered these 18,222 unique  
140 sequences to express a uniquely barcoded sfGFP transcript and subsequently integrated this  
141 pooled library of reporter constructs into the *nth-ydgR* intergenic locus within the *E. coli*  
142 chromosomal terminus using a recombination-mediated cassette exchange system<sup>41</sup>. We  
143 determined promoter activity levels by performing targeted amplicon sequencing of the barcoded  
144 sfGFP transcripts to quantify RNA-seq levels of each barcode normalized to their DNA-seq  
145 abundances, and precisely measured expression for 97.5% (17,767/18,222) of TSSs in this library  
146 (**Figure 1C**) with an average of 69.5 barcodes measured per library member (**Figure S1A**).  
147 Expression measurements were consistent between replicates which were separately barcoded,  
148 cloned, and quantified ( $R^2 = 0.919$ ,  $p < 2.2 \times 10^{-16}$ ) (**Figure S1B**). To call a TSS active we set a  
149 threshold of at least greater than two standard deviations above the median of the negative  
150 control distribution and normalized the data such that the threshold value was set to 1 (**Figure**  
151 **1D**). Among the 17,635 original TSSs, we confidently quantified 17,189 (97.4%) and identified  
152 2,670 exhibiting expression levels above our experimentally determined threshold (**Figure 1E**).  
153 Notably, this number of active promoters is more consistent with the number of operons  
154 identified using long-read sequencing to characterize full-length *E. coli* transcripts<sup>42,43</sup>. Amongst  
155 these 2,670 confirmed promoters, we recovered expression data for many well-known promoters  
156 and three of the strongest corresponded to the 16S and 23S polycistronic operon, the most highly  
157 expressed operon in the *E. coli* genome<sup>44</sup>.

158  
159 To confirm whether our set of negative controls were truly depleted of promoter activity, we tested  
160 a set of 936 completely random 150 bp nucleotide sequences and compared the expression  
161 levels to our negative controls (**Figure S2**). Despite overall low mean levels of expression  
162 (Random sequences: 0.115, Negative controls: 0.036), 2.35% of random promoters drove  
163 expression higher than our negative threshold whereas only 0.851% of negative controls  
164 exceeded this threshold. A recent study found that 4/40 (10%) random 103 bp sequences  
165 exhibited promoter activity<sup>45</sup> and suggests the frequency of promoter-like activity in overall  
166 sequence space is seemingly very high. These results demonstrate that the negative controls  
167 used in our assay are depleted in promoter activity, even compared to completely random  
168 sequences, and implies that there is negative selection for spurious promoter activity across  
169 certain regions of the *E. coli* genome.

### 170 171 **Chromosomal-position specific effects are consistent across diverse promoter sequences**

172  
173 Several recent studies have shown that promoter expression levels can be highly variable  
174 between genomic locations<sup>25,27,28</sup>. However, these studies have primarily focused on individual  
175 promoters in multiple locations, leaving uncertainty regarding whether these effects are

176 promoter-specific or represent a more widespread phenomenon impacting any promoter at a  
177 given position. To study these chromosomal position effects across a wide range of promoters,  
178 we integrated the entire TSS promoter library in both left and right chromosomal midreplichoes  
179 and compared expression measurements between these positions and the *E. coli* chromosomal  
180 terminus (**Figure S1C**). Promoter measurements remained highly consistent between locations,  
181 although the two midreplichore positions exhibited slightly higher concordance with each other  
182 ( $r = 0.97, p < 2.2 \times 10^{-16}$ ), than either midreplichore to the terminus ( $r = 0.95, p < 2.2 \times 10^{-16}$ ). Positive  
183 control sequences, which do not contain regulatory elements in addition to the RNAP binding  
184 sites, were highly correlated between all locations. We conclude that overall, diverse promoters  
185 exhibit similar relative expression levels across genome-positions, although the absolute  
186 expression may vary.

187

### 188 **Inactive TSS-associated promoters are enriched for -10 but not -35 $\sigma 70$ binding motifs**

189

190 A majority of *E. coli* promoters are regulated by the housekeeping sigma factor  $\sigma 70^{46}$ , and thus  
191 we expected that active promoters would be enriched for the canonical  $\sigma 70$  motifs. Promoters of  
192 the  $\sigma 70$  family are well known for containing two hexamer motifs, the -10 and -35 motifs, which  
193 recruit RNAP and are named after their position relative to the TSS. We used a  $\sigma 70$  position-weight  
194 matrix (PWM)<sup>16</sup> to analyze whether active TSS promoters were enriched for these motifs.  
195 Although both active and inactive TSS-associated promoters were enriched for the canonical -10  
196 motif compared to our negative controls (active:  $p < 2.2 \times 10^{-16}$ , inactive:  $p = 6.2 \times 10^{-8}$ ), we found  
197 the -35 scores of inactive promoters were generally no greater than negative controls ( $p = 0.33$ )  
198 (**Figure 1F**). Conversely, active TSS-associated promoters contained significantly higher -35  
199 scores than negative controls ( $p = 1.4 \times 10^{-8}$ ) or inactive TSS-associated promoters ( $p < 2.2 \times 10^{-16}$ ).  
200 We conclude that inactive TSS-associated promoters lack -35 elements but may become  
201 active in growth conditions where additional transcription factors mobilize and facilitate RNAP  
202 positioning in the absence of a -35 motif.

203

### 204 **Genome-wide Identification of *E. coli* promoters**

205

206 Despite functionally screening 17,635 previously implicated TSS regions, we encountered  
207 instances where essential operon promoters remained unidentified, suggesting that there were  
208 still undiscovered promoters within the genome. For instance, despite screening several reported  
209 TSS regions upstream of the essential *yrbA-murA* operon, none exhibited expression greater than  
210 our activity threshold. To comprehensively detect all promoters, we cloned, barcoded, and  
211 measured the transcriptional activity in LB of 321,123 sheared genomic fragments ranging  
212 between 200 and 300 bp (median = 244 bp), providing  $\sim 8.5x$  coverage per strand of the *E. coli*  
213 genome (**Figure 2A, Figure S3A, Figure S3B**). We averaged the expression of fragments  
214 overlapping each nucleotide position to achieve highly replicable values of strand-specific  
215 promoter activity at single-nucleotide resolution (**Figure S3C**). This data may be viewed using our  
216 online tool (<https://ecolipromoterdb.com>), revealing defined regions of promoter activity across  
217 the entire *E. coli* genome (**Figure 2B**). We classify candidate promoter regions as contiguous  
218 regions of at least 60 bp with promoter activity measurements higher than an empirically derived

219 threshold. This threshold was established to maximize recall of previously identified active TSSs  
220 while minimizing the inclusion of inactive TSSs.

221  
222 With the chosen threshold, we found 3,477 candidate promoter regions in LB that overlapped  
223 2,293/2,670 (85.8%) active TSSs identified in LB, 3,193/14,493 (22.0%) inactive TSSs, and 47/482  
224 (9.75%) negative controls. Active TSSs not overlapping a candidate promoter region generally  
225 exhibited weak activity, which may indicate that greater sensitivity is achieved through testing of  
226 oligo-array synthesized regions (**Figure S3D**). In many cases, candidate promoter regions  
227 overlapped multiple TSS-associated promoters, both active and inactive, indicating the potential  
228 for multiple promoters within individual regions (**Figure 2B**). Overall, we detected strong promoter  
229 activity at active TSSs with little promoter activity at inactive TSS promoters, demonstrating  
230 agreement between these independent methods for capturing genome-wide promoter activity  
231 (**Figure 2C**).

232

### 233 **Fine mapping of *E. coli* promoters within transcriptionally active regions**

234  
235 Our survey of genomic fragments identified candidate regions of promoter activity that were well  
236 above the expected size of typical promoters (**Figure S3E**)<sup>39</sup>. To determine if these candidate  
237 regions contained multiple promoters, we constructed a library of 48,379 150 bp oligos that tiled  
238 the entire lengths of the 3,477 promoter regions identified in LB at 10 bp intervals (**Figure 2D**). For  
239 candidate promoter regions under 150 bp, we synthesized a single oligo encoding the region  
240 without including additional surrounding sequence context. We recovered highly replicable data  
241 for 45,201(93.4%) of these variants with an average of 8 barcodes per variant (**Figure S3F, S3G**).  
242 Using this approach, we could precisely pinpoint the boundaries of promoters by observing the  
243 specific locations along the promoter region where tiled oligos exhibited changes in expression  
244 levels. (**Figure 2E**). This analysis revealed that 1,889 of the previously identified promoter regions  
245 contained one or more discrete promoters, including 278 regions containing multiple promoters  
246 (**Figure 2F**). Notably, the number of promoters within a given region correlated with the size of  
247 the candidate region (**Figure S3H**) but not necessarily the overall promoter activity of the region  
248 (**Figure S3I**). In 1,465 candidate regions, no promoters were detected. These regions typically  
249 measured under 150 bp in length, raising the possibility of being false positives or potentially  
250 requiring additional transcription factors beyond the scope of the 150 bp regions assessed.  
251 Altogether, this approach identified 2,228 distinct promoters active in LB. Furthermore, by  
252 determining the overlap of all active oligos tiling a promoter, we were able to infer the minimal  
253 sequence necessary for each promoter. When comparing the sizes of the minimal sequence  
254 necessary for promoter activity, we observed an enrichment for sequences of approximately 40  
255 bp, which is a typical size for  $\sigma 70$  promoters<sup>47-49</sup> (**Figure 2G**). We also observed an enrichment  
256 for 150 bp minimal promoter regions, although these were generally weak indicating that our  
257 resolution is limited when tiling weaker promoters. Overall, we were able to precisely map  
258 boundaries for 2,228 promoters active in LB. Considering non-overlapping active promoters  
259 identified during our TSS screen, we find 2,859 distinct promoters. Amongst these promoters, we  
260 have identified promoters regulating 99 out of 100 randomly sampled essential genes including  
261 the promoter for the essential *yrbA-murA* operon which was missed in the TSS screen

262 **(Supplementary Table 1)**. The missing promoter was for the *yjeE* gene, which exhibits an atypical  
263 operon structure, wherein the first gene in the operon overlaps a gene encoded in the opposite  
264 direction. Furthermore, we detected promoter activity in regions 100 bp upstream of 24 of 38  
265 recently described small open reading frames (smORFs) identified by ribosome profiling<sup>50</sup>,  
266 indicating that these proteins may be transcriptionally-regulated independently of larger  
267 neighboring genes (**Figure S4**).

268  
269 **Intragenic promoters are widespread, often found in the antisense orientation, and alter**  
270 **transcript levels and codon usage of the genes they are within.**

271  
272 While promoters are commonly thought of as gene regulatory sequences upstream of transcribed  
273 genes, they can also be found within genes and oriented to transcribe genes in the antisense  
274 direction. We thus sought to explore these atypical promoters and their consequences on the *E.*  
275 *coli* genome and transcriptome. Many studies have found pervasive antisense transcription in  
276 prokaryotes<sup>51-54</sup>, though there is controversy over the functional relevance and whether they are  
277 just due to a noisy transcriptional apparatus<sup>55</sup>. At the same time, it has been functionally shown  
278 that antisense promoters can alter a sense gene's transcription, translation, and steady-state  
279 message levels<sup>35,56</sup>. Amongst the 2,228 promoters we precisely mapped, 1,131 were primarily  
280 encoded within intergenic regions while 944 were found to fully or mostly overlap intragenic  
281 regions (**Figure 3A, Figure S5A**). Notably, intragenic promoters exhibited a higher prevalence  
282 within single-gene operons compared to individual genes within polycistronic operons ( $p = 1.05$   
283  $\times 10^{-9}$ ,  $df = 1$ , Chi-squared Test). Although intergenic promoters were predominantly positioned in  
284 the sense orientation relative to the nearest downstream gene, 300 of the 944 intragenic  
285 promoters were positioned antisense relative to the genes they overlapped. Interestingly,  
286 intragenic promoter activity had greater correlation when comparing activity between growth  
287 mediums, indicating that these regions may be primarily composed of constitutive promoter  
288 elements (LB:  $r = 0.648$ , M9 minimal:  $r = 0.787$ ,  $p > 1 \times 10^{-16}$ , Wilcoxon rank-sum test, **Figures S5B-**  
289 **C**).

290  
291 Given that we have determined the locations of the antisense promoters driving transcription, we  
292 evaluated the genome-wide consequences of antisense promoters on the transcriptome. We  
293 performed RNA-Seq on *E. coli* MG1655 grown in LB and compared the transcript coverage of all  
294 genes with sense promoters, antisense promoters, and both sense and antisense promoters. We  
295 found that overall, genes regulated by both sense and antisense promoters exhibited a two-fold  
296 decrease in expression compared to strictly sense-regulated genes (**Figure 3B**). Notably, sense-  
297 regulated genes exhibited similar promoter activity on average when compared to genes with  
298 both sense and antisense promoters, indicating that the result cannot be attributed solely to  
299 stronger promoters in sense-regulated genes. Genes with only antisense promoter activity  
300 generally did not exhibit detectable sense transcription.

301  
302 The significant overlap observed between protein-coding and promoter sequences is interesting  
303 given the sequence specificity necessary to encode these distinct functions. Therefore we sought  
304 to investigate how sequences navigate this constraint to accommodate diverse activities. After

305 comparing the amino acid composition within intragenic promoters, we observed a significant  
306 enrichment of stop codons and a preference for amino acids encoded by codons with higher AT  
307 nucleotide content (**Figure 3C**). Further inspection revealed specific codons that were  
308 preferentially utilized within intragenic promoter regions (**Figure 3D**), with a notable bias observed  
309 among arginine codons, showing a strong preference for AGA and AGG codons. The most  
310 enriched codons within intragenic promoters were typically rare in the genome, which may  
311 indicate a role of preferential codon usage in controlling promoter activity within genes. The  
312 connection between rare codons and regulatory roles has been previously observed in the context  
313 of N-terminal codon bias, where rare codons influenced expression levels through secondary  
314 structure interactions<sup>57</sup>. Moreover, the observed higher percentage of AT-content<sup>58,59</sup> and rare  
315 codons<sup>60</sup> may further support the notion that intragenic promoters are linked to horizontally-  
316 acquired genes.

317  
318 Next, we investigated how intragenic promoter sequences had adapted to conform to the  
319 constraints of protein-coding sequence space. A peculiar feature of promoter sequences in *E.*  
320 *coli*, is the presence of trinucleotides matching stop codons within the canonical -10 and -35  $\sigma$ 70  
321 motifs (-35: 5'-TTGACA, -10: 5'-TATAAT). Therefore, we hypothesized that the reuse of these  
322 nucleotide patterns offers another mechanism by which the *E. coli* genome counteracts the  
323 spurious evolution of intragenic promoters, thereby explaining their scarcity relative to the ease  
324 by which they can evolve<sup>45</sup>. We used a  $\sigma$ 70 PWM<sup>16</sup> to identify the highest-scoring  $\sigma$ 70 motifs within  
325 intragenic promoters and determined their relative coding frames. Interestingly, we observed a  
326 lower frequency of -35 elements in +2 coding frames and the -35 motifs detected at +2 positions  
327 exhibited significantly reduced resemblance to the canonical motif (**Figure S6A**). Similarly, -10  
328 motifs were least frequently found in the +1 positions, although -10 motifs at this position did not  
329 show lower overall scores (**Figure S6B**). The observed depletion of -35 motifs positioned in the  
330 +2 reading frame and -10 motifs in the +1 reading frame is likely due to the fact that the canonical  
331 sequences for these motifs would create stop codons within the protein if placed at these  
332 positions. This suggests a simple, but effective preventative mechanism against the spurious  
333 evolution of intragenic promoters that is inherent to their sequence motifs.

334

### 335 **The *E. coli* promoter landscape is dynamic in response to environmental conditions**

336  
337 It is well understood that bacterial cells respond to environmental conditions through changes in  
338 their transcriptional profiles<sup>61</sup>, however, it has not been shown how the global promoter landscape  
339 changes to facilitate these cellular transitions. To explore this, we measured promoter activity of  
340 our genomic fragment library in exponentially growing cells under glucose minimal media  
341 conditions. Compared to LB, cells grown in glucose minimal media do not have access to  
342 environmental amino acids and must synthesize these and other essential compounds on their  
343 own<sup>62</sup>. We recovered replicable promoter activity measurements for 318,457 genomic fragments  
344 in glucose minimal media, spanning the genome with 8.38x coverage (**Figure S7A, Figure S7B**).  
345 We identify 3,321 candidate promoter regions in glucose minimal media with an average length  
346 of 293 bp (**Figure S7C**). Although 2,466 of these regions overlapped with regions found in LB, we  
347 found 960 only found in LB and 1,029 exclusive to M9 (**Figure 4A**). Many of these condition-



348 dependent promoter regions were weak compared to those identified in both conditions (**Figure**  
349 **S7D**), nonetheless, each condition revealed distinct strongly activated regions unique to it. The  
350 observed low activity of condition-unique promoters is similar to what has been observed in  
351 synthetic inducible promoter systems, where tightly-regulated promoters often exhibit reduced  
352 expression in induced conditions<sup>63</sup>. To identify the most differentially-expressed promoters in  
353 each condition, we extracted regions larger than 60 bp that exhibited greater than two-fold  
354 difference in activity between conditions. With this criterion, we found 278 regions upregulated in  
355 LB and 644 regions upregulated in glucose minimal media. In glucose minimal media, the greatest  
356 increase in promoter activity occurred at *ryhB*, a Fur-regulated gene encoding a small RNA that  
357 regulates iron-binding and iron-storing proteins when available iron is limited<sup>64,65</sup> (**Figure S7E**). In  
358 LB, the strongest activated region is positioned to drive expression of the *rbsDACBKR* operon,  
359 which is essential for uptake and utilization of extracellular ribose<sup>66</sup> (**Figure S7E**).

360  
361 For each condition, we matched activated intergenic and sense promoter regions with the nearest  
362 downstream gene and found 159 genes poised for activation in LB and 392 genes poised for  
363 activation in glucose minimal media. To see if promoter activation resulted in an increase in  
364 expression of these genes, we compared RNA-Seq coverage of the genes with the top 100  
365 strongest promoter activation in each condition (**Figure S8**). In each condition, promoter  
366 activation resulted in a concomitant increase in RNA-Seq coverage (LB:  $p = 1.1 \times 10^{-5}$ , M9:  $p = 1.9$   
367  $\times 10^{-5}$ , Wilcoxon rank-sum test). To see which cellular responses were being mobilized by  
368 remodeling the promoter landscape, we used the RAST annotation engine<sup>67,68</sup> to assign functional  
369 categories to activated genes and identify enriched cellular processes. Genes downstream of  
370 promoter regions activated in LB are predominantly associated with carbohydrate utilization  
371 whereas genes downstream of promoters activated in glucose minimal media were associated  
372 with amino acid utilization (**Figure 4B**). Overall, we find distinct condition-dependent activation of  
373 promoter regions leading to changes in gene expression associated with carbohydrate utilization  
374 in LB and amino acid utilization in glucose minimal media.

375  
376 Next, we explored how these changes in the promoter landscape are mediated by transcriptional  
377 machinery and evaluated the transcription factor binding site (TFBS) composition of promoter  
378 regions activated in each condition. As opposed to traditional transcriptomebased  
379 measurements which measure changes in downstream gene expression, this assay identifies  
380 upstream regulatory regions that contribute to promoter activity in response to changing  
381 conditions. By cross-referencing these activated promoter regions to TFBSs reported by  
382 RegulonDB, we identified transcription factors facilitating these changes to the promoter  
383 landscape (**Figure 4C**). Upon comparing TFBS content of these regions we found that binding  
384 sites for several global transcriptional regulators<sup>69</sup>, including IHF, Lrp, and Fis occurred at similar  
385 frequencies between these conditions. Conversely, binding sites for Fur, another global  
386 transcription factor, were enriched by roughly 20-fold within regions activated in glucose minimal  
387 media compared to regions activated in LB. This transcription factor is essential for maintaining  
388 iron homeostasis<sup>70,71</sup>, and is a known regulator of *ryhB*, the most upregulated gene we found in  
389 glucose minimal media. Binding sites for CRP were enriched by more than two-fold in regions  
390 activated in LB compared to glucose minimal media. This transcription factor is activated in

391 glucose-limited conditions and so would likely not induce promoter activity in glucose minimal  
392 media. Overall, we found 455 TFBSs within regions activated in LB and 637 annotations in regions  
393 activated in glucose minimal media (**Figure 4D**). In addition to global regulators, we found many  
394 TFBSs that appear exclusive to each condition targeting relatively few regulatory targets.  
395 Interestingly, the combined contribution of non-global transcription factors activating 10 or fewer  
396 sites were responsible for over a third of all activated promoter regions, underscoring the  
397 significant involvement of local transcriptional regulators in driving the overall changes to the  
398 transcriptome. Transcription factors MetJ, GadX, and GadW were exclusively found in regions  
399 activated in glucose minimal media whereas FlhDC, GlpR, and CytR were the most enriched  
400 amongst regions activated in LB.

#### 401 402 **Mutational scanning of 2,057 *E. coli* promoters identifies regulatory elements controlling** 403 **transcription**

404  
405 After globally identifying promoter regions in the bacterial genome, we sought to develop an  
406 approach to identify sequence motifs regulating these promoters. Recent work has demonstrated  
407 a high-resolution saturation mutagenesis approach to identify regulatory motifs within individual  
408 uncharacterized promoters<sup>21,72</sup>. Inspired by this work, we implemented a scanning mutagenesis  
409 strategy to explore the sequence features that regulate active promoters. For 2,057 active TSS-  
410 associated promoters identified in LB, we systematically scrambled individual 10 bp sequences  
411 spanning the -120 to +30 positions at five bp intervals (**Figure 5A**). Using this approach, we would  
412 expect that disrupting a repressor site would increase expression, whereas disrupting a RNAP or  
413 activator site would decrease expression. These scrambled sequences were designed to  
414 maximize distance from the original sequence while maintaining nucleotide content, ensuring  
415 perturbation of any motifs at each position contributing to transcriptional regulation. In total, we  
416 designed a library of 59,653 sequences consisting of 2,057 active TSS-associated promoters,  
417 their scrambled variants, and the previously described set of negative and positive controls. We  
418 measured promoter activity of this library as before and recovered replicable expression  
419 measurements for 52,900/59,653 (89%) of this library in LB, with an average of seven barcodes  
420 per variant (**Figure S9A, S9B**). Using this approach, we identify regions that either increased or  
421 reduced expression across thousands of promoters in a single assay (**Figure 5B**). These  
422 sequences were enriched at the -35 and -10 positions for regions that increased expression,  
423 which is expected considering the majority of promoters are  $\sigma 70$  dependent. However, many  
424 sequences outside of these -10 and -35 regions were also found to contribute to regulation.

425  
426 To validate our approach, we first examined the *lacZYA* promoter, a classic gene regulation model  
427 whose sequence motifs are well characterized. This promoter is known to contain a variety of  
428 regulatory motifs, including twin LacI repressor sites centered at +11 and -82<sup>73</sup>, a CRP activator  
429 site centered at -61<sup>74</sup>, and a  $\sigma 70$  RNAP binding site. Our analysis revealed distinct signals  
430 corresponding to each of these sites, as well as quantitative measurements for their contribution  
431 to expression (**Figure 5C**). Additionally, scanning mutagenesis of the previously characterized  
432 *relBE* promoter achieved similar results, identifying a reported RelBE repressor site at the +1  
433 position<sup>75</sup> as well as -10 and -35  $\sigma 70$  recognition motifs<sup>75</sup>.

434  
435 Considering that our approach effectively captures the effects of known binding sites, we  
436 proceeded to investigate whether it could also identify regulatory sites within uncharacterized  
437 promoters. Although we performed this scanning mutagenesis for 2,057 TSS-associated  
438 promoters, here we highlight a few examples to demonstrate the utility of this method (**Figure**  
439 **5D**). The cyclopropane fatty acyl phospholipid synthase gene, *cfa*, exhibits dynamic expression<sup>76</sup>  
440 and plays a crucial role in cell membrane integrity under acidic conditions<sup>77</sup>. While there have  
441 been several transcription factors implicated in regulation of *cfa*, the motifs responsible for its  
442 direct regulation are still unknown. Our approach identified a candidate  $\sigma$ 70 promoter regulating  
443 this gene with a -10 motif centered 34 nucleotides upstream of the reportedly associated TSS as  
444 well as a -35 motif 57 bp upstream, implying that the reported TSS is likely not the primary site  
445 for transcription initiation. Additionally, we identified two repressor sites—one located in the  
446 spacer region and another upstream of the -35 motif. We also identified novel regulatory regions  
447 for an uncharacterized promoter regulating *rpsL*, an essential gene and component of the 30S  
448 ribosomal subunit. In this case, we identified a candidate  $\sigma$ 70 RNAP binding site with predictably  
449 positioned -10 and -35 motifs, as well as an unknown repressor located over the transcription  
450 start site. Notably, mutating the repressor site resulted in a threefold increase in promoter  
451 expression. Although further experiments<sup>21</sup> are necessary to identify the transcription factors  
452 acting on these promoters, our results provide valuable insights by pinpointing the sequence  
453 elements responsible for the regulation of these genes.

#### 454 455 **Global identification of 7,293 *E. coli* promoter regulatory motifs**

456  
457 We expanded the scope of our analysis to systematically explore the regulatory motifs amongst  
458 all 2,057 promoters tested. We used individual barcode measurements, across four replicates, to  
459 find significant differences between the mean expression of the WT and mutated sequences  
460 (Student's t-test with 1% FDR). Among the mutations that significantly altered expression, 1,885  
461 increased expression whereas 5,408 decreased expression (**Figure 6A**). Mutated sites were  
462 located throughout promoters and resulted in dramatic changes in expression, some over 100-  
463 fold (**Figure S10A**). We observed markedly different distributions for the positions of sequences  
464 that increased expression compared to those causing decreased expression (**Figure 6B**). Regions  
465 that increased expression were enriched at the -10, -35, and -70 positions, which is consistent  
466 with the  $\sigma$ 70 RNAP binding motif as well as the typical position of transcriptional activators  
467 among class I bacterial promoters<sup>78-80</sup>. Regions that decrease expression were found to localize  
468 to the TSS, spacer, and -35, which is consistent with known mechanisms of RNAP occlusion by  
469 steric hindrance<sup>80,81</sup>. Alternatively, repressive sites within the spacer could be negatively  
470 influencing transcriptional initiation through transcription factor-independent mechanisms<sup>82</sup>.  
471 Furthermore, we found that intergenic promoters contained more regions that altered promoter  
472 activity when scrambled compared to intragenic promoters, implying that intragenic promoter  
473 sequences contain more compact or fewer regulatory elements (**Figure S10B**).

474  
475 Next, we cross-referenced these regulatory regions with the extensive collection of putative and  
476 experimentally determined regulatory sites reported by RegulonDB<sup>83</sup>. First, for all promoter

477 mutagenesis profiles, we merged adjacent regions found to influence promoter activity, resulting  
478 in the identification of 1,414 regions that increase expression and 1,903 regions that decrease  
479 expression. Sites were 20 bp on average (indicating they exhibited regulatory impacts across four  
480 consecutive 10 bp scramble mutations spaced 5 bp apart) (**Figure S10C**) with effect sizes largely  
481 independent of their lengths (**Figure S10D**). Of the 2,453 unique TFBSs reported by RegulonDB,  
482 1,156 overlap with regulatory regions identified by our analysis and 49% (567/1,156) resulted in a  
483 significant change in activity of the promoter. The effect we observed after disrupting these  
484 reported TFBSs often did not agree with the annotated effect. Our scrambling results agreed with  
485 the reported effect for 65% (185/253) of activators and 43% (196/450) of repressors (**Figure 6C**).  
486 We presumed the lower concordance with repressors could be due to scrambling mutations  
487 disrupting both a repressor and -35 or -10 element, resulting in a decrease in expression which  
488 would appear to contradict a reported repressor site. Looking at the distribution of concordance  
489 for merged scrambles by position relative to the TSS, we observed a higher proportion of  
490 disagreement near the -35 and -10 elements, suggesting overlapping scrambles may be  
491 disrupting crucial promoter elements in addition to reported repressor sites (**Figure S10E, S10F**).  
492 This may be expected considering that many repressors operate by binding regions proximal to  
493 the RNAP binding site. Regardless, we found several examples where the regulatory effects  
494 predicted by RegulonDB were contradicted with strong evidence, which may indicate that the  
495 effect of the reported annotation is incorrect or that these sites may support multiple transcription  
496 factors (**Figure 6D**). Overall, we characterized regulatory sequences in promoters driving  
497 expression of 1,158 of the 2,565<sup>83</sup> operons in *E. coli* as well as many other confirmed promoters.  
498 Thus, we conclude that this approach is an efficient and effective method to rapidly characterize  
499 regulatory motifs within thousands of experimentally verified promoter regions.

500

### 501 **Predicting promoter activity from sequence remains a challenge**

502

503 In this study we generated a powerful dataset linking 117,556 unique 150 bp sequences to a  
504 quantitative measurement of *in vivo* promoter activity. Using this unique dataset, we evaluated  
505 our ability to determine whether a promoter was active or inactive (classification) and the precise  
506 level of activity (regression). We trained several machine learning models of varying complexity  
507 for both classification and regression. As many sequences are highly similar due to library design  
508 and close proximity of previously reported TSSs, we split the data into 75% for training (n = 87,164)  
509 and 25% (n = 30,392) for testing according to genomic location, ensuring the two sets contain  
510 sequences equidistant to the origin (see Methods). For classification, we determined a threshold  
511 independently for each library based on the negative controls. Sequences are considered active  
512 if their expression is greater than two standard deviations above the negative median value and  
513 inactive if expression falls below this threshold.

514

515 We trained several different classifiers to predict whether a given sequence was active or inactive  
516 (**Figure 7A**). All classifiers output the predicted probability for each class, rather than directly  
517 predicting the class, allowing them to be compared using precision-recall curves. Further details  
518 for all models are included in the methods. We trained a simple logistic regression based on four  
519 biophysical features known to be associated with promoter strength: max -10  $\sigma$ 70 motif position

520 weight matrix (PWM) score, max  $\sigma$ 70 -35 motif PWM score, paired -10 and -35 PWM score (PWMs  
521 scanned jointly allowing for, 16, 17, or 18 gap between the -10 and -35), and percent GC content.  
522 We trained this model only using variants from the TSS library, which contained the greatest  
523 diversity, as the model was unable to converge when trained on the full dataset. For comparison,  
524 we trained a gapped k-mer SVM (gkm-SVM) model with word-length 10 and 8 informative  
525 columns ( $L = 10$ ,  $K = 8$ ) on the same training set, as this model is best suited for sample sizes  
526 under 20,000 and observed decreased performance relative to the logistic regression (AUPRC =  
527 0.43, AUPRC = 0.53, respectively). Furthermore, we created a feature set of all 3 to 6-mer  
528 frequencies and trained a logistic regression, partial least squares discriminant analysis (PLS-  
529 DA), and multi-layer perceptron (MLP). To observe the effects of reducing dimensionality, we  
530 additionally trained on only 6-mer frequencies for the MLP and random forest. For the simpler  
531 logistic regression and PLS-DA we performed an additional feature selection step based on the  
532 performance of a random k-mer. All models performed similarly, with AUPRC ranging from 0.26  
533 to 0.33.

534  
535 There has been recent work predicting transcriptional regulatory activity from MPRA data using  
536 convolutional neural networks (CNNs), which capture intricate sequence features without *a priori*  
537 knowledge<sup>84</sup>. Inspired by this work, we trained a CNN using the DragoNN toolkit which is built on  
538 top of the keras python package<sup>85</sup>. We performed hyperparameter tuning for a three-layer CNN  
539 and achieved an AUPRC = 0.44. Next, we compared the CNN to other machine learning models  
540 that require less hyperparameter tuning and are more interpretable. For comparison, we trained  
541 a random forest on one-hot encoded DNA, which is not well suited to categorical features, and  
542 achieved an AUPRC = 0.27. Furthermore, we trained this model using frequencies of 6-mers and  
543 observed a slight increase in performance (AUPRC = 0.31). Overall, the CNN achieved the highest  
544 AUPRC, but the logistic regression fit with biophysical features more accurately at higher levels  
545 of recall. However, these two models may not be directly comparable, as the logistic regression  
546 was trained on only the TSS library rather than the full dataset.

547  
548 We separately trained all of the models described above, with the exception of gkm-SVM, for the  
549 more difficult task of regression (**Figure 7B**). Additionally, we included a linear regression model  
550 that fit to the four “mechanistic” features to predict log-transformed expression. We evaluated  
551 each model using root mean squared error (RMSE) and  $R^2$  between predicted and observed values  
552 for promoter activity. Many models perform similarly to each other, with the CNN achieving the  
553 highest R-squared and lowest RMSE (RMSE = 3.12,  $R^2 = 0.31$ ,  $p < 2.2 \times 10^{-16}$ ). We observe  
554 improvement in the linear regression on log-transformed data compared to linear regression  
555 without transformation, suggesting there are non-linear relationships that are presumably  
556 captured by more complex models. Random forest on one-hot encoded DNA performs worse than  
557 random forest on 6-mer frequencies, in line with the heuristic that random forests are not well  
558 suited to categorical features. Overall, the CNN performs best in both classification and  
559 regression, although simpler models have some predictive power and have the benefit of faster  
560 training times.

## 561 Discussion

562 More than fifty years have passed since the first conceptions of what bacterial promoters were.  
563 Today, *E. coli* promoters are arguably the most well-studied gene regulatory element and yet we  
564 cannot seem to agree on basic questions of how many promoters exist, what elements define  
565 their function, how constrained they are in sequence space, and how far are we from predicting  
566 promoter activity from sequence. Systematic identification and characterization based on  
567 transcriptional profiling is confounded by genomic location, RNA processing, stability, and  
568 detection differences due to differences in sequences expressed.

569  
570 Here we attempted to separate promoter activity from other mechanisms of gene regulation to  
571 systematically identify promoter locations, strength, and internal structure genome-wide in rich  
572 media conditions. We systematically probed previous predictions and combined them with more  
573 unbiased approaches to better understand promoter architecture in *E. coli*. Overall, we found  
574 2,859  $\leq 150$ bp promoters during log-phase growth in LB, which is consistent with recent  
575 estimations by RNA profiling using long-read sequencing technologies<sup>42,43</sup> and in vitro  
576 transcriptional assays<sup>86</sup>. This included many promoters contained within genes, often in the  
577 antisense direction, that had large effects on mRNA levels and constrained codon choice within  
578 these genes. Despite the ability of our approach to interrogate promoter activity across the entire  
579 genome, there are certainly many more condition-specific promoters that remain undiscovered.  
580 Moreover, it is likely that we have not identified all active promoters even under the conditions  
581 investigated in this study. It is essential to acknowledge that our approach to classifying  
582 sequences as promoters is based on an empirically derived threshold. However, this is a  
583 simplification as promoters that fall below the threshold could become active due to the influence  
584 of other factors, such as message stability<sup>31</sup> and genomic context<sup>25,27,28</sup>. Taken together, these  
585 measurements provide one of the richest datasets on autonomous promoter activity. Our data  
586 suggests that all sequences have some propensity to be a promoter, and this propensity is further  
587 modulated by other factors such as stability of the message produced or integration locus to  
588 ultimately determine mRNA levels. Moreover, the frequency of promoter-like activity in overall  
589 sequence space is seemingly very high. This view is consistent with the surprising ease by which  
590 promoters evolve from random sequences<sup>45,87,88</sup>.

591  
592 Our scanning mutagenesis of active TSS-associated promoters identified 3,317 regions with no  
593 corresponding TFBS annotation in RegulonDB, revealing that there is a great deal more we can  
594 learn about how regulation is encoded in the *E. coli* genome. For regions that overlapped known  
595 sites, an appreciable proportion disagreed with the reported effect. There could be several  
596 explanations for this disagreement and the discovery of these missing annotations. First, it could  
597 be that the predictions of TFBSs in RegulonDB are actually false positives due to promiscuous or  
598 nonproductive binding events. This seems plausible considering a recent study of the global  
599 transcription factor PhoB, which supports the notion that transcription factors engage in many  
600 genomic binding events with apparent non regulatory functions<sup>89</sup>. Second, some transcription  
601 factors may possess condition-dependent behavior and the conditions tested in our study do not  
602 capture the full scope of their regulatory program. Finally, it is plausible that a portion of the sites

603 we identify represent true functional sites that are missing from current annotation and should  
604 be interesting targets for further dissection, such as identifying which transcription factors  
605 operate at these motifs. Further studies using high resolution mutagenesis strategies<sup>21</sup> will be an  
606 effective approach to determining which sequences within promoters contribute to regulation  
607 and further efforts to predict promoter sequence-function relationships.

608  
609 To better understand how promoter activity is modulated by sequence, we trained a suite of  
610 machine learning models to identify promoter sequences (classification) and predict the precise  
611 level of activity (regression). These models varied in complexity, from simple linear regression  
612 models based on a handful of known biological features to CNNs trained on raw sequence. Even  
613 with the large training set and a wealth of mechanistic information, the performance of these  
614 predictive models is limited. There are several possible explanations for why it remains a  
615 challenge to classify or predict the activity of *E. coli* promoters. First, it is likely challenging to  
616 develop a single generalizable model for all promoters as there are several families of sigma  
617 factors with distinct motifs. Therefore, models that are sigma-factor specific may be more  
618 tractable. Indeed, recent studies by us and others have leveraged large MPRA datasets  
619 characterizing  $\sigma 70$  promoters to develop a variety of statistical and biophysical models that  
620 predict expression with surprisingly high accuracy<sup>38,90-92</sup>. These findings suggest that overcoming  
621 the challenges associated with promoter activity prediction is plausible with the appropriate  
622 training sets and a reasonable scope of study. Second, although the range of our MPRA is quite  
623 dynamic, accurate predictive models may require techniques with even greater quantitative  
624 resolution, especially in the noise regime of the assay where most observations fall. Finally, we  
625 might simply lack the basic models for how sequences define biological functions, such as  
626 promoter activity, and thus we are looking in the wrong places for information. Recent efforts to  
627 use much larger libraries of random DNA sequences to identify strong promoters may serve as a  
628 better starting point to constrain computational models for how sequences affect function<sup>93,94</sup>.

629  
630 The experimental workflows demonstrated here enable the rapid and iterative exploration of how  
631 sequence affects bacterial promoter function. The convergence of DNA synthesis technologies  
632 with multiplexed assays for genetic function now allow an individual to routinely design, build and  
633 test  $10^4$ - $10^5$  designs on a monthly basis. Such empirical power has no equivalent in other physical  
634 systems and has now reached the limits of human experimental design and planning. Thus,  
635 understanding bacterial promoters might be one of the best problems to develop and test large-  
636 scale design-of-experiment and active learning methodologies to build better predictors and  
637 discriminate between different mechanistic models of function.

638  
639  
640  
641  
642  
643  
644  
645

646 **Acknowledgements**

647

648 This work was supported by the National Science Foundation Graduate Research Fellowship  
649 2015210106 and the HHMI Hanna H. Gray Postdoctoral Fellowship (GT15182) to G.U., National  
650 Institutes of Health New Innovator Award DP2GM114829 to S.K., Searle Scholars Program (to  
651 S.K.), U.S. Department of Energy (DE-FC02-02ER63421 to S.K.), UCLA, and Linda and Fred Wudl.  
652 We thank the UCLA BSCRC high throughput sequencing core and Technology Center for  
653 Genomics and Bioinformatics for technical assistance; Robert B. Phillips, Reid C. Johnson, and  
654 Jeffery H. Miller for thoughtful feedback throughout this project; Matteo Pellegrini for  
655 computational advice; Christina P. Burghard for advice on bioinformatics analysis; and all past  
656 and present members of the Kosuri lab for technical feedback. Furthermore, we would also like  
657 to thank David Gray and Lisa M. Golden for manuscript feedback. We would also like to thank  
658 the invaluable resources of RegulonDB and EcoCyc as well as all contributors to these  
659 collections. Lastly, we thank the UCLA Molecular Biology Interdepartmental Graduate Program  
660 and UCLA Bioinformatics Interdepartmental Graduate Program.

661

662 **Author Contributions**

663

664 G.U., K.D.I., H.K., and S.K. designed the study. G.U., A.D.T., and M.B. developed and performed  
665 experimental methods. N.B.L. developed the genomic fragmentation isolation method. G.U.,  
666 K.D.I., and A.D.T. analyzed, and interpreted data. T.C. developed k-mer based multilayer  
667 perceptron for promoter prediction. K.D.I. developed and implemented machine learning  
668 approaches for promoter prediction. C.A. and G.U. created the interactive website for data  
669 sharing. G.U., K.D.I., and S.K. wrote the manuscript.

670

671 **Declaration of Interests**

672

673 S.K. is cofounder and CEO and holds equity in Octant Inc. N.L. is an employee and holds equity  
674 in Octant Inc. All other authors declare no competing interests.

675

676 **Declaration of Generative AI and AI-assisted technologies in the writing process**

677

678 During the preparation of this work the author(s) used Chat GPT (GPT-3.5) in order to improve  
679 language and clarity. After using this tool/service, the author(s) reviewed and edited the content  
680 as needed and take(s) full responsibility for the content of the publication.

681

682 **Inclusion and Diversity**

683

684 One or more of the authors of this paper self-identifies as an underrepresented ethnic minority  
685 in their field of research or within their geographical location. One or more of the authors of this  
686 paper self-identifies as a gender minority in their field of research. One or more of the authors of  
687 this paper received support from a program designed to increase minority representation in  
688 their field of research.



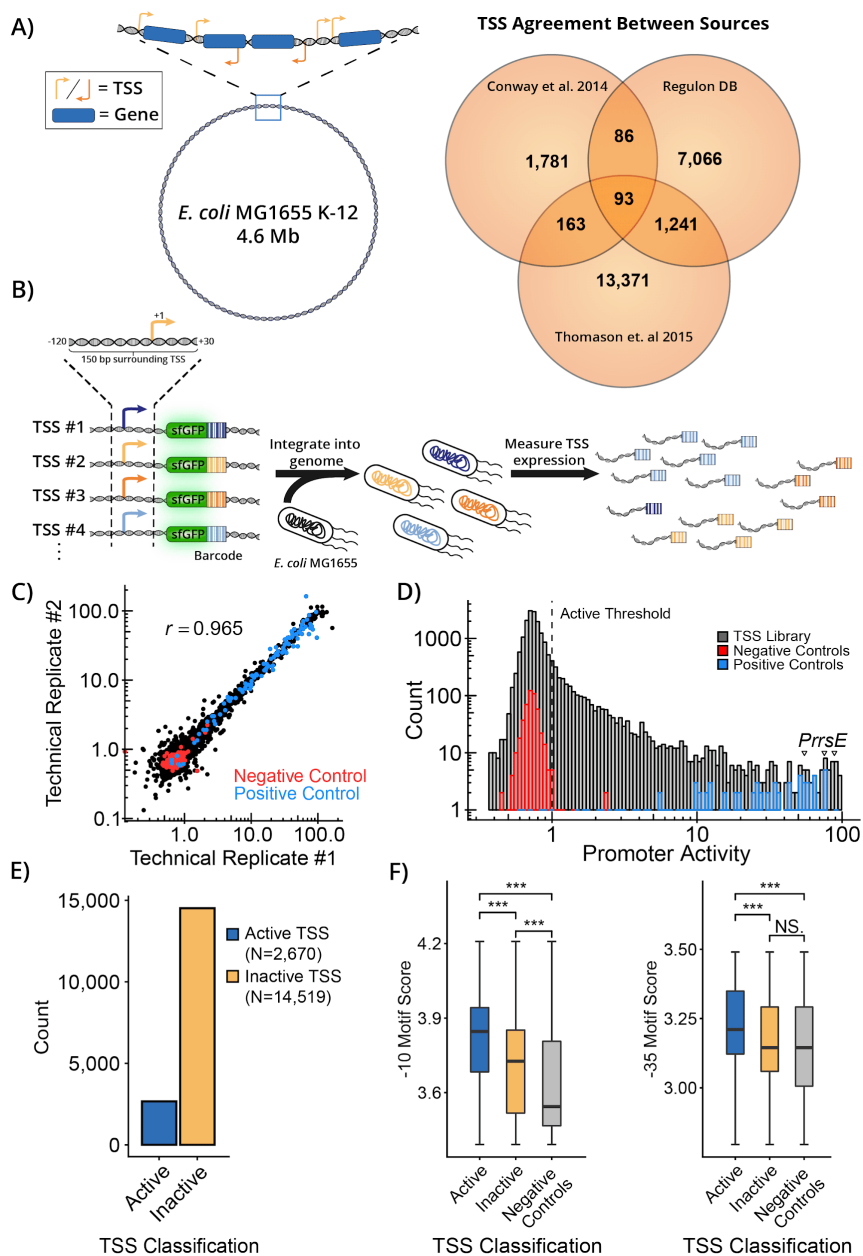

689  
 690 **Figure 1) Functional characterization of 17,635 previously reported *E. coli* promoters.** **A)** Three  
 691 sources of genome-wide promoter predictions show little agreement in the reported TSSs at the  
 692 single-nucleotide level. **B)** We synthesized oligos overlapping the -120 to +30 bp context of  
 693 17,635 reported TSSs and integrated construct into a fixed genomic landing pad. Measuring  
 694 barcode expression using RNA-Seq captures quantitative measurements of transcriptional  
 695 activity for individual TSSs. **C)** MPRA results are highly replicable across technical replicates ( $r =$   
 696  $0.965$ ,  $p < 2.2 \times 10^{-16}$ ). **D)** The TSS library measurements span over 100-fold with negative  
 697 controls exhibiting low levels of expression and positive controls spanning the entire dynamic  
 698 range. **E)** A majority of tested TSSs are inactive in LB. **F)** Active and inactive TSSs have  
 699 significantly different mean PWM scores for -10 and -35  $\sigma^{70}$  motifs (Wilcoxon rank-sum test,  
 700 “\*\*\*” =  $\leq 0.001$ ).

701

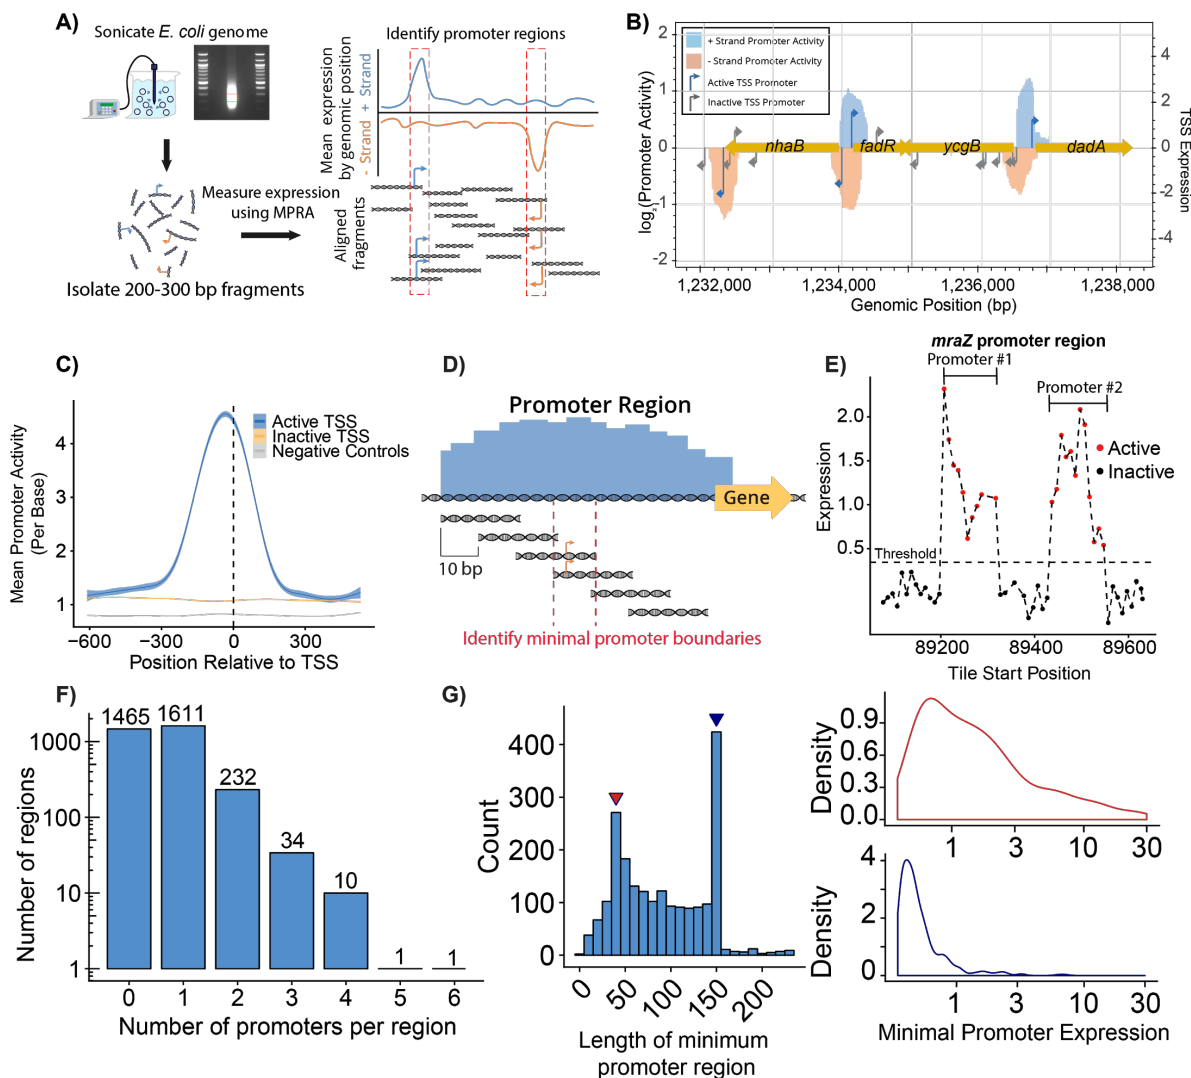

702  
 703 **Figure 2) Genome-wide Identification of *E. coli* promoters.** **A)** 321,123 shared genomic  
 704 fragments were screened using the same MPRA platform. The fragments were 200 to 300 bp in  
 705 size giving an average 8.5x coverage across each strand of the *E. coli* genome. Promoter  
 706 activity of each fragment was measured and averaged at each position to recover nucleotide-  
 707 specific expression. **B)** We created a website to showcase the *E. coli* promoter landscape  
 708 (<https://ecolipromoterdb.com/>). This section of the genome displayed in this figure contains  
 709 five candidate promoter regions that appear within intergenic regions. **C)** Meta-analysis of mean  
 710 promoter activity at experimentally validated active TSSs, inactive TSSs, and negative controls.  
 711 **D)** Oligo tiling library identifies promoters within candidate promoter regions. We synthesized  
 712 150 bp oligos tiling all promoter regions identified in rich media at 10 bp intervals. We then  
 713 determine minimal promoter boundaries by identifying the overlap of transcriptionally active  
 714 tiles. **E)** Oligo tile expression across the *mraZ* promoter shows two distinct promoters. Positions  
 715 are defined according to the right-most genomic position of each 150 bp oligo. Dashed line  
 716 indicates the threshold for active oligo tiles **F)** Distribution of the number of promoters per  
 717 promoter region shows many regions contain multiple promoters. **G)** Left: Distribution of the

718 lengths of the minimal promoter boundaries shows enrichment for  $\sigma 70$ -promoter sized regions  
 719 (40 bp). Right: 40 bp minimal promoters (red) span a wide range of expression whereas 150 bp  
 720 promoters are typically weak (blue).  
 721

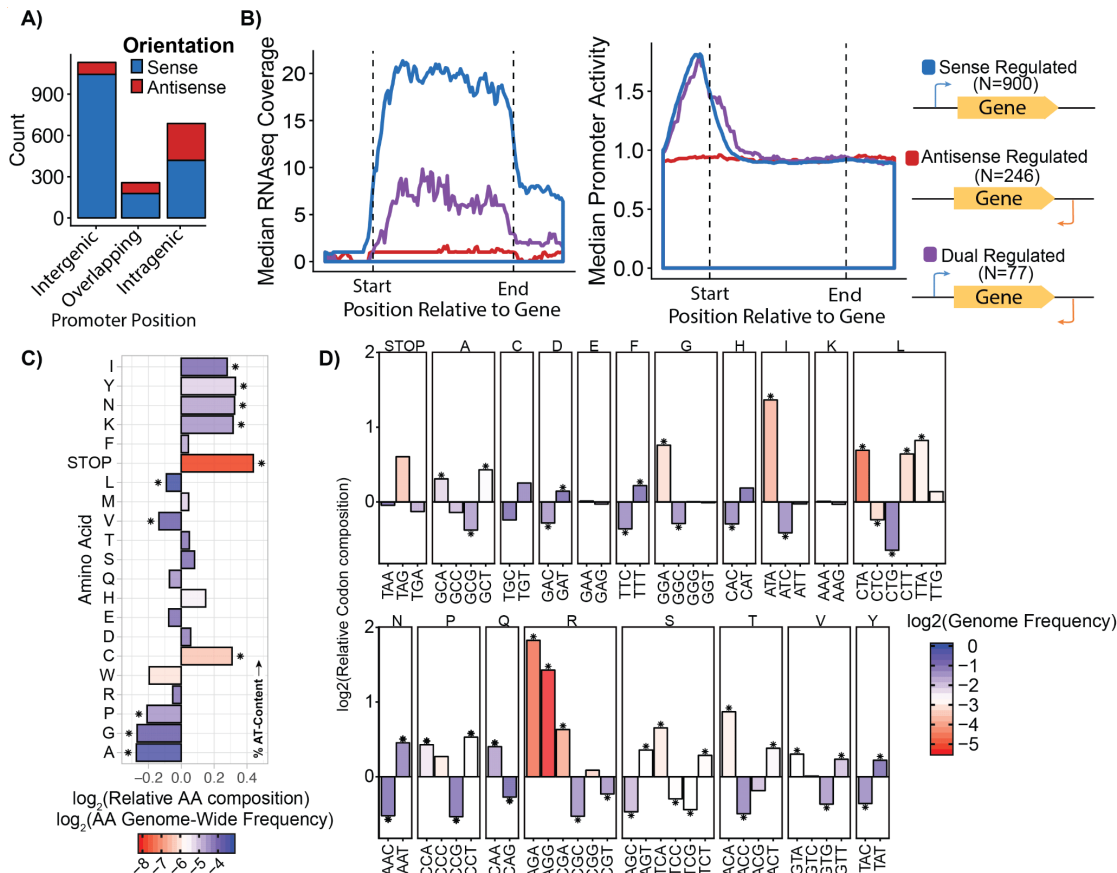

722 **Figure 3) Intragenic promoters are widespread, often found in the antisense orientation, and**  
 723 **alter transcript levels and codon usage of the genes they are within. A)** Orientation and  
 724 **positioning of identified promoters reveals many promoters are intragenic and antisense. B)**  
 725 **Antisense promoters suppress gene expression genome-wide. Left: Meta-gene analysis of the**  
 726 **median RNA-Seq coverage across all sense, antisense, and dual-regulated genes. Right: Meta-**  
 727 **gene analysis of sense promoter activity at sense, antisense, and dual regulated genes. C)**  
 728 **Intragenic promoters are enriched for specific amino acids relative to whole genome amino acid**  
 729 **frequencies (Chi-squared test, “\*” =  $p < 0.05$ ). Amino acids are arranged by mean AT-content of**  
 730 **all corresponding codons. D)** Specific, often rare, codons are enriched in intragenic promoters.  
 731 Codon bias within intragenic promoters relative to whole genome. Bars are colored by the  
 732 relative genome-wide usage compared to other synonymous codons (Chi-squared test, “\*” =  $p <$   
 733  $0.05$ ).  
 734

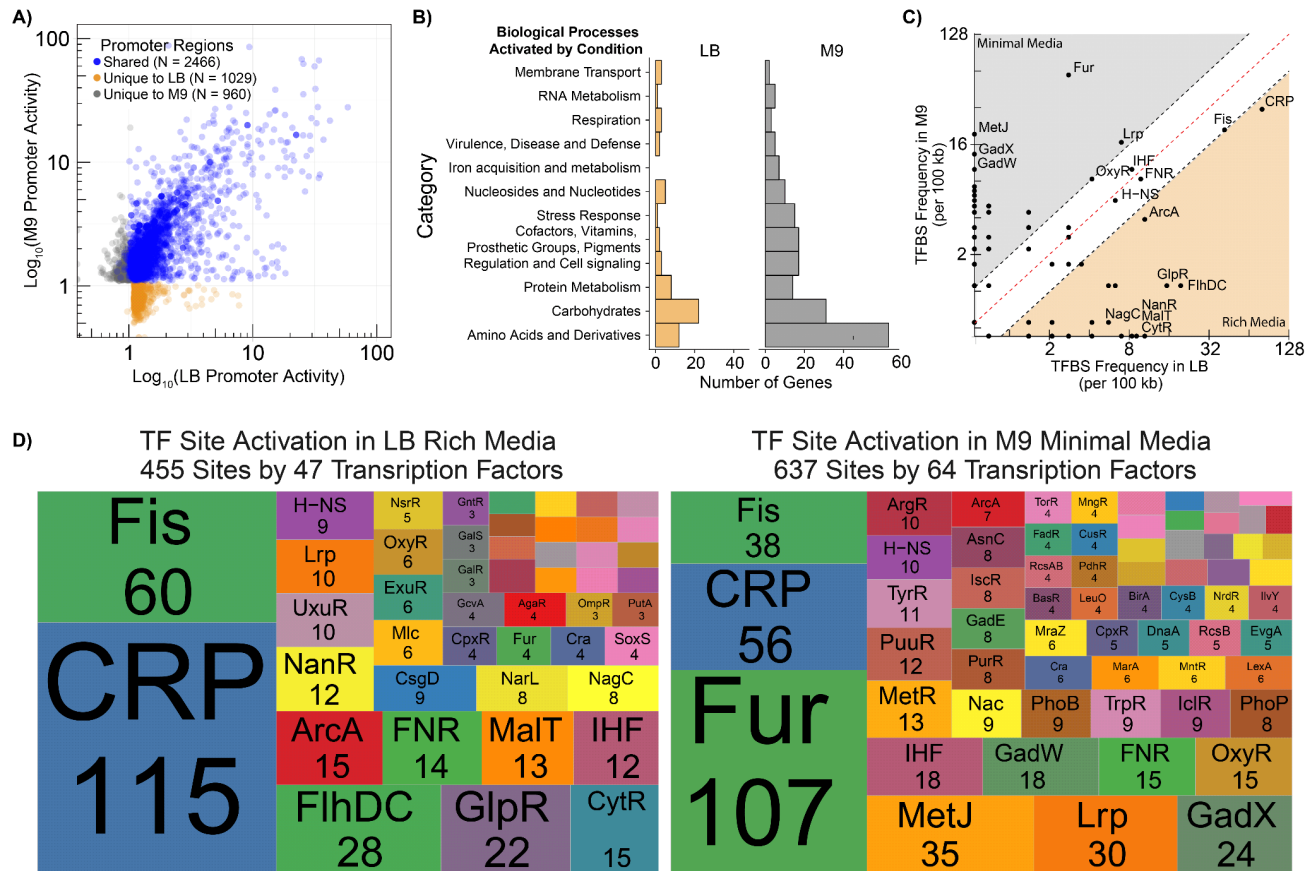

735  
 736 **Figure 4) The *E. coli* promoter landscape dynamically responds to environmental conditions. A)**  
 737 Shared and unique promoter regions are found between LB and glucose minimal media. **B)**  
 738 Genes activated by promoters in glucose minimal media are enriched for amino acid-related  
 739 genes according to RAST subsystem annotations. **C)** Occurrence of reported transcription  
 740 factor binding sites in promoter regions activated in LB compared to glucose minimal media  
 741 (M9). Black lines indicate 2-fold enrichment threshold. **D)** Number of binding sites per  
 742 transcription factor within activated promoter regions. A median of four sites per transcription  
 743 factors were activated in LB and a median of five sites in M9.

744  
 745  
 746

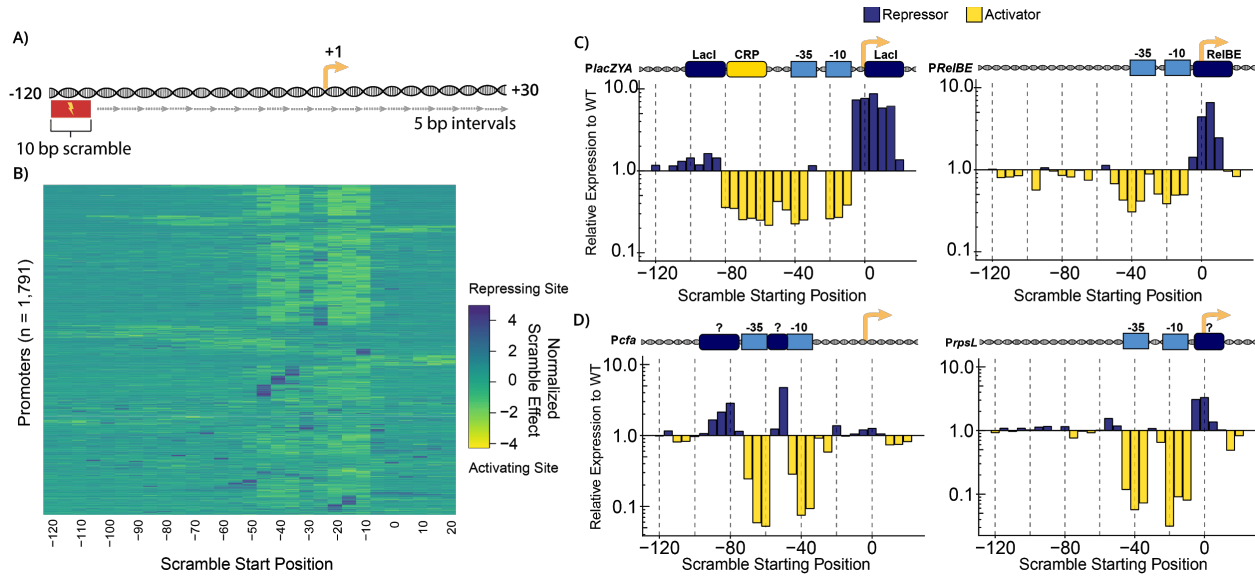

747  
748 **Figure 5) Scanning mutagenesis of 2,057 TSS-associated promoters identifies known and**  
749 **novel regulatory motifs.** **A)** Scanning mutagenesis of 2,057 *E. coli* promoters to identify  
750 regulatory elements. For each promoter, 10 bp regions were mutated across the full length of  
751 the promoter at 5 bp intervals. **B)** Mutating each position across *E. coli* promoters identifies  
752 sequences that activate and repress promoter activity. Rows are rearranged using hierarchical  
753 clustering and the intensities are normalized within each row. **C)** Scanning mutagenesis of the  
754 well-characterized (Left) *lacZYA* and (Right) *relBE* promoters captures known regulatory  
755 elements. **D)** Scanning mutagenesis of the newly characterized (Left) *cfa* and (Right) *rpsL*  
756 promoters identifies regions encoding regulation within these promoters.

757  
758  
759  
760  
761  
762  
763

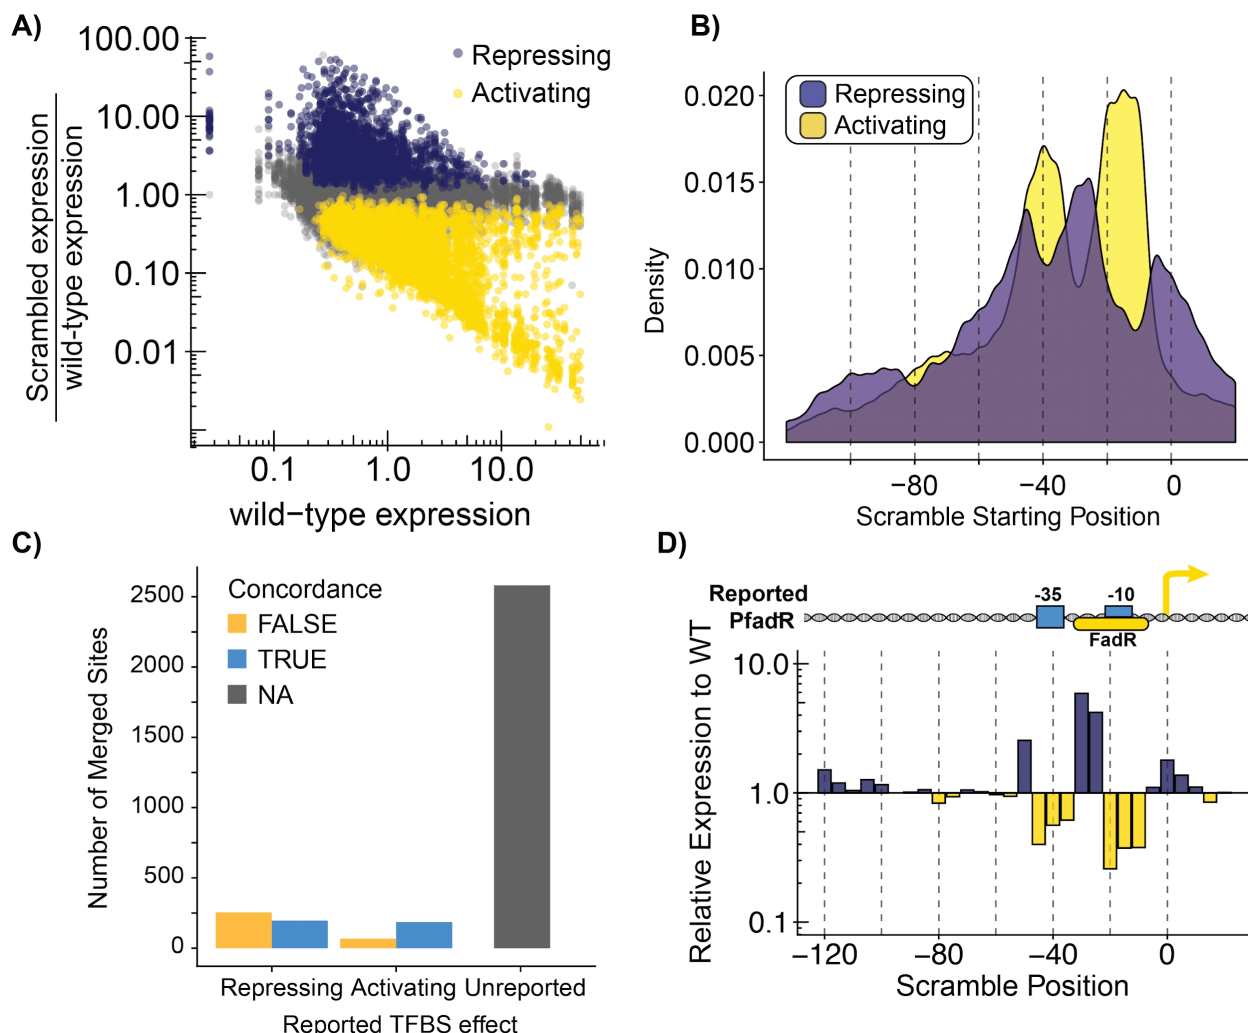

764  
 765 **Figure 6) Global identification of 3,317 *E. coli* regulatory motifs by scanning mutagenesis.** **A)** We  
 766 identified scrambled regulatory regions that significantly increase (N = 1,885) or decrease (N=5,408)  
 767 expression when scrambled relative to the unscrambled promoter. Data are colored by whether the  
 768 regulatory region activates or represses activity of the promoter. **B)** Activating promoter sequences are  
 769 enriched at the -10, -35, and -80 positions whereas repressing sequences are enriched at +1, -20, and -50  
 770 positions. **C)** Identified regulatory regions overlapping reported TFBS annotations shows mixed  
 771 concordance with reported effects; 77.8% (2,583/3,317) of identified regulatory regions are unreported by  
 772 RegulonDB. **D)** Scanning mutagenesis of the *FadR* promoter (bottom) identifies a repressing sequence  
 773 near the -30 that has been reported to be activating (top).

774

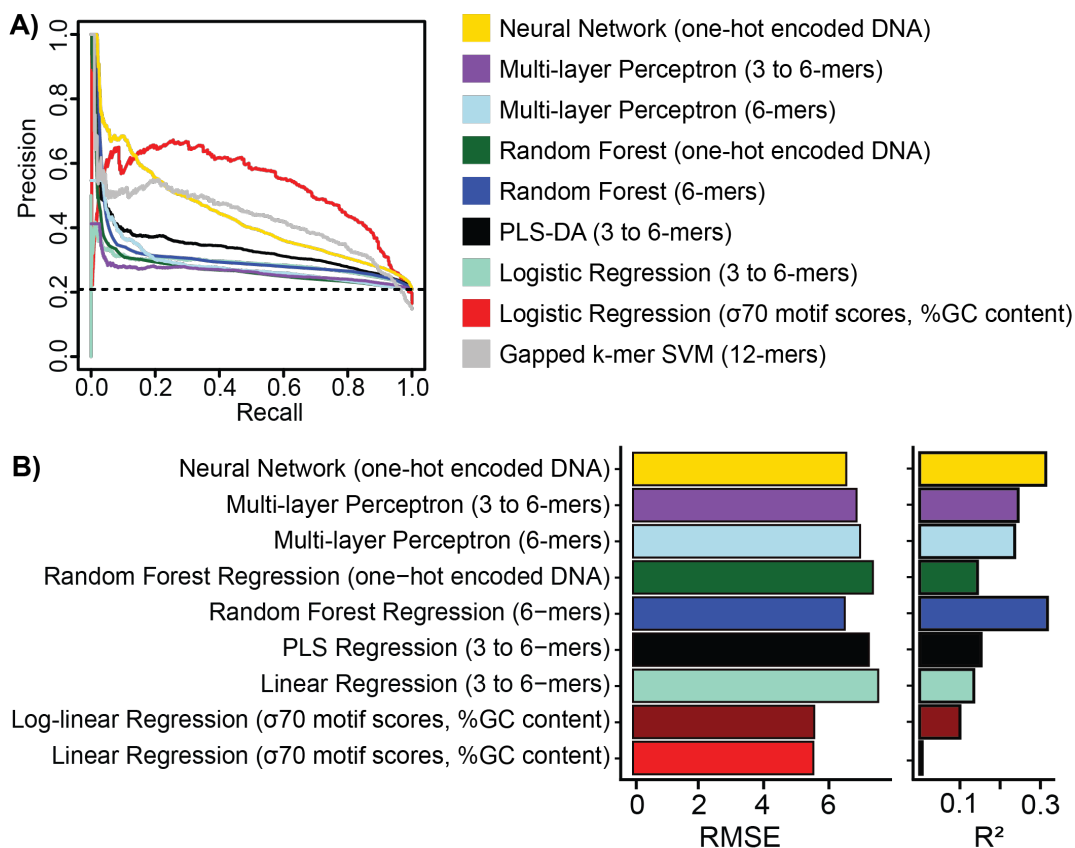

775

776

777

778

779

780

781

782

783

784

785

786

787

788

789

790

791

792

793

794

795

796

797

798

Figure 7) **Various machine learning models for promoter activity classification and regression. A)** Performance of various models to classify promoter sequences. Convolutional neural networks performed best in the lower recall range, while logistic regression based on simple hand-crafted features performs better in the higher recall range. Dashed line represents the expected performance from random prediction using full library. **B)** Performance of regression models to predict a quantitative level of promoter activity. We evaluated performance using both root mean squared error (RMSE) and coefficient of determination ( $R^2$ ) on the held-out test set. Similar to classification, convolutional neural networks performed the best with the lowest RMSE and highest  $R^2$ .

799 **Methods**

800

801 **Strains**

802

803 All experiments were performed in the *E. coli* MG1655 background<sup>95</sup> which carries the following  
804 genotype: F-,  $\lambda$ , *rph-1* (Yale Coli Genetic Stock Center no. 6300). For the genomically-integrated  
805 MPRA, previously reported strains<sup>38</sup> with engineered landing pads in the right midreplicore  
806 (*essQ-cspB* intergenic locus, Addgene no. 110244), chromosomal terminus (*nth-ydgR* intergenic  
807 locus, Addgene no. 110245), and left midreplicore (*ybbD-ylbG* intergenic locus, Addgene no.  
808 110243) were used. Briefly, these landing pads encode a fluorescent mCherry reporter as well as  
809 chloramphenicol resistance, both of which are flanked by *loxP* sites for recombination-mediated  
810 cassette exchange.

811

812 **TSS library design**

813

814 The TSS library incorporates all TSSs from the RegulonDB database<sup>83</sup> (Version 8.0,  
815 genome version U00096.2) and those identified in two recent genome-wide TSS mapping  
816 studies<sup>18,19</sup>. Recent work provides evidence that most regulatory motifs fall within 100 bp  
817 upstream of the TSS<sup>39</sup> and the initial transcribed region (+1 to +20) can also influence gene  
818 expression. Thus, each TSS was synthesized embedded in its local sequence context -120 to +30  
819 relative to the TSS, capturing a majority of the *cis*-regulatory elements. There were 23,798 unique  
820 TSSs across all three sources, many of which were a few base pairs away from each other. We  
821 minimized redundancy and collapsed together TSSs within 20 bp and selected the most upstream  
822 TSS for our library, yielding 17,635 TSSs for the final synthesized library. Additionally, we included  
823 500 negative controls from the *E. coli* genome that are assumed to have minimal regulatory  
824 activity. These were selected from 150 bp regions that are more than 200 bp from a TSS (on either  
825 strand), and many fall within coding regions. We included a set of 112 short synthetic positive  
826 controls that were previously characterized<sup>40,96</sup> and span a wide range of expression.

827

828 **TSS library barcoding and cloning**

829

830 The TSS library was synthesized by Twist Biosciences and delivered lyophilized as a 26 pmol  
831 pool. The library was resuspended in 100  $\mu$ L of TE pH 8.0 and 1  $\mu$ L was amplified for 12 cycles  
832 using GU72 and GU116 with NEB Q5 High-Fidelity 2x Master Mix (#M0492L). Unless otherwise  
833 stated, all amplifications were performed using this polymerase mixture. This product was then  
834 ran on a 2% TAE agarose gel and approximately 200 bp amplicons were extracted using a  
835 Zymoclean Gel DNA Recovery Kit (#D4008). For barcoding, 1 ng of this eluate was amplified for  
836 9 cycles using primers GU72 and GU73. Following cleaning using a Zymo Clean and Concentrator  
837 Kit (#D40140), the library was digested using NEB's SbfI-HF and XhoI.

838

839 The plasmid backbone, pLibacceptorV2 (Addgene #106250) was digested using SbfI-HF and Sall-  
840 HF with the addition of rSAP (NEB #M0371S). The digested library was ligated into  
841 pLibacceptorV2 using T7 DNA Ligase (NEB #M0318S), cloned into 5-alpha Electrocompetent *E.*



842 *coli* (NEB #C2989K), and plated on LB + kanamycin (25 ug/mL) yielding approximately 2.3 million  
843 colonies estimated by counting simultaneously plated dilutions. After allowing for 24 hours of  
844 growth on plates, the library was scraped and resuspended in LB, and then 800 million cells  
845 (based on OD<sub>600</sub>) were inoculated in 450 mL LB + kanamycin (25 ug/mL) overnight. Unless stated  
846 otherwise, all plasmids were isolated using a Qiagen Plasmid Plus Maxiprep Kit (#12963) and  
847 concentrated using a Promega Wizard SV Gel and PCR Clean-up System (#A9281).

848  
849 In order to clone the RiboJ::sfGFP reporter construct, the library was digested using NEB's Bsal-  
850 HF and NheI-HF with the addition of rSAP. The reporter construct was digested using NEB's Bsal-  
851 HF and NcoI-HF. Similarly to the previous cloning step, the reporter was cloned into the library  
852 using T7 DNA Ligase, cloned into 5-alpha electrocompetent *E. coli*, and plated on LB + kanamycin  
853 (25 ug/mL), yielding 6.8 million colonies. The completed plasmid library was isolated as stated  
854 above.

855

### 856 **Isolation of genomic fragment library**

857

858 To isolate genomic fragments, 10 ug of *E. coli* MG1655 gDNA was sheared using a Covaris  
859 focused ultra-sonicator. The settings used were as follows: Duty factor was set to 10%, Intensity  
860 was set to 4, cycles/burst was set to 200, and time was 60 seconds. The sheared gDNA was ran  
861 on a 3% TAE agarose gel and fragments between 200 and 300 bp were extracted using a  
862 Zymoclean Gel DNA Recovery Kit and eluted in 18 uL water. All 18 uL of the extracted fragments  
863 were end repaired using Enzymatics End Repair Mix (Part # Y9140-LC-L) following manufacturers  
864 protocols, cleaned using 45 uL (1.8x volume) of Agencourt AMPure XP Beads (#A63880), and  
865 eluted in 20 uL of water. The 20 uL eluate was A-tailed following the New England Biolabs  
866 protocol:

867

868 Reaction:

869 20 uL End-repaired DNA  
870 5 uL NEB Buffer 2 (10x)  
871 0.5 uL dATP (10mM)  
872 3 uL Klenow Fragment (3' -> 5' exo-) (Enzymatics #P7010-HC-L)  
873 21.5 uL Nuclease-free water

874

875 The reaction was Incubated for 30 minutes at 37°C, then heat inactivated for 20 minutes at 75°C  
876 before cleaning using 90 uL Agencourt AMPure XP beads and eluting in 20 uL water. Y-adapters  
877 to facilitate fragment amplification and barcoding were ligated to the A-tailed fragments using  
878 the following reaction mix:

879

880 Reaction:

881 20 uL A-tailed DNA  
882 5 uL NEB T4 DNA Ligase Buffer (10x) (NEB #B0202S)  
883 2 uL Y-adapter GU Y-Frag (25 uM)  
884 1 uL NEB T4 DNA Ligase (NEB #M0202T)

885 22 uL Nuclease-free water

886

887 This reaction was incubated for 20 minutes at 25°C, heat inactivated for 20 minutes at 65°C, and  
888 subsequently cleaned using 90 uL Agencourt AMPure XP beads and eluting in 12 uL nuclease-  
889 free water.

890

### 891 **Barcoding and cloning of genomic fragment library**

892

893 To barcode the genomic fragments, 1 uL of the processed fragments was amplified for 13 cycles  
894 using GU72 and GU116. This product was then cleaned using a Zymo Clean and Concentrator Kit  
895 and eluted in 12 uL nuclease-free water. For barcoding, 1 ng of this eluate was amplified for 10  
896 cycles using primers GU72 and GU73. Following cleaning using a Zymo Clean and Concentrator  
897 Kit (#D40140), the library was digested using NEB's SbfI-HF and XhoI.

898

899 This library was cloned following the same protocols as the TSS library. The transformation of  
900 the barcoded library yielded approximately 3.3 million colonies and the transformation after  
901 addition of the RiboJ::sfGFP yielded approximately 1.25 million colonies.

902

### 903 **Genomic promoter tiling library design**

904

905 We used a custom peak caller on the single-nucleotide resolution strand-specific expression  
906 pileup generated from our genomic fragment library to define "peaks" of promoter activity. Our  
907 peak calling method is simple and conservative, as we wanted to tile the most active regions and  
908 keep the library size reasonable. We defined a peak as a continuous region with expression above  
909 an empirically determined threshold. We considered a continuous range of thresholds and for  
910 each evaluated the percentage of active TSSs, from our previous library, contained in a peak and  
911 determined an expression level of 1.1 was sufficient and captured 90% of active TSSs (data not  
912 shown). We required that each peak be at least 60 bp, and merged adjacent peaks that were within  
913 40 bp, yielding 1753 and 1724 peaks for the minus and plus strands, respectively. We tiled each  
914 peak by synthesizing 150 bp windows across the region, with no overlap between adjacent tiles,  
915 yielding 48,491 peak tiles. Additionally, we included 1000 randomly generated 150 bp sequences  
916 to test what fraction of random sequence can drive expression. We included the same set of  
917 positive and negative controls as described in the TSS library design.

918

### 919 **Genomic promoter tiling library barcoding and cloning**

920

921 The active TSS mutagenesis library was synthesized by Agilent and delivered lyophilized as a 10  
922 pmol pool. The library was resuspended in 100 uL of TE pH 8.0 and 1 uL was amplified for 10  
923 cycles using GU120 and GU121. This product was then cleaned using a Zymo Clean and  
924 Concentrator Kit and eluted in 12 uL nuclease-free water. For barcoding, 1 ng of this eluate was  
925 amplified for 8 cycles using primers GU120 and GU122. Following cleaning using a Zymo Clean  
926 and Concentrator Kit (#D40140), the library was digested using NEB's SbfI-HF and XhoI.

927

928 This library was cloned following the same protocols as the TSS library. The transformation of  
929 the barcoded library yielded approximately 1.5 million colonies and the transformation after  
930 addition of the RiboJ::sfGFP yielded approximately 5.2 million colonies.

931

### 932 **Active TSS mutagenesis design**

933

934 We systematically mutagenized all active TSSs from our initial TSS library to design a follow-up  
935 library. We used 500 negative controls to classify the TSS library into active and inactive TSSs.  
936 We set the active threshold at two standard deviations above the median expression for the  
937 negative controls, resulting in 2,670 active TSSs. We mutagenized the active sequence by  
938 scrambling 10 bp windows, sliding across the 150 bp at 5 bp intervals, resulting in 5 bp of overlap  
939 between adjacent scrambles. We scrambled the sequence using the existing 10 bp to preserve  
940 nucleotide content and selected the scramble that was most dissimilar to the original sequence  
941 out of 100 scrambling attempts. Our final library included 59,653 scrambled sequences and 2,057  
942 unscrambled sequences. We also included the same set of negative and positive controls as  
943 described above for the TSS library, for a total library size of 62,322.

944

### 945 **Active TSS mutagenesis library barcoding**

946

947 The active TSS mutagenesis library was synthesized by Agilent and delivered lyophilized as a 10  
948 pmol pool. The library was resuspended in 100 uL of TE pH 8.0 and 1 uL was amplified for 12  
949 cycles using GU123 and GU124. This product was then cleaned using a Zymo Clean and  
950 Concentrator Kit and eluted in 12 uL nuclease-free water. For barcoding, 1 ng of this eluate was  
951 amplified for 10 cycles using primers GU123 and GU125. Following cleaning using a Zymo Clean  
952 and Concentrator Kit (#D40140), the library was digested using NEB's SbfI-HF and XhoI.

953

954 This library was cloned following the same protocols as the TSS library. The transformation of  
955 the barcoded library yielded approximately 3.7 million colonies and the transformation after  
956 addition of the RiboJ::sfGFP yielded approximately 5.2 million colonies.

957

### 958 **Library Barcode mapping**

959

960 We used PCR to individually barcode each library sequence to quantitatively measure expression  
961 in our MPRA. Prior to genome integration, DNA-sequencing was performed to computationally  
962 map barcodes to sequences. A custom barcode mapper developed by Nathan Lubock<sup>97</sup> was  
963 used to collapse reads into a barcode-sequence map. We used two filtering steps for barcode  
964 quality. First, we required a minimum number of reads for every barcode, assuming reads that  
965 appear once or twice correspond to sequencing errors. Second, BBMap<sup>98</sup> was used to align the  
966 reads associated with a given barcode, and discarded barcodes that map to sequences that are  
967 too dissimilar to one another. A Levenshtein distance of 30 was used to discard barcodes that  
968 map to two very distinct sequences, while still allowing for a small number of sequence errors.

969

970

971 **Library integration into specific genomic loci**

972

973 Library integration was performed as previously described<sup>38</sup>.

974

975 The isolated plasmid library was digested with Sall-HF and NheI-HF to eliminate incompletely  
976 cloned plasmid before transformation into electrocompetent MG1655 with a landing pad  
977 engineered in the *nth-ydgR* locus and plating on LB + kanamycin (25 ug/mL). Colonies were  
978 resuspended in LB and 800 million cells were inoculated into 250 mL LB + kanamycin (25 ug/mL)  
979 and grown overnight. Several 2 mL frozen aliquots were made of this overnight culture.

980

981 The library was integrated into the *nth-ydgR* locus as follows. A frozen aliquot of MG1655 with a  
982 landing pad engineered in the reverse orientation at the *nth-ydgR* intergenic locus was  
983 transformed with the library and grown overnight in 200 mL LB + kanamycin (25 ug/mL).  
984 Following overnight growth, 400 million cells of this culture were seeded into 250 mL LB +  
985 kanamycin (25 ug/mL) + 0.2% arabinose (g/mL) and grown for 24 hours. After integration of the  
986 library, the plasmid backbone was removed through heat-curing. From the 24 hour induced  
987 culture, 800 million cells were inoculated into 80 mL of LB + kanamycin (25 ug/mL) and grown at  
988 42 °C for approximately 1.5 hours before reaching an OD<sub>600</sub> = 0.3. Upon reaching exponential  
989 growth, 200 million cells from this culture library were plated and grown for 16 hours at 42 °C.  
990 Heat-cured plates were scraped and resuspended in LB and 400 million cells were inoculated into  
991 200 mL LB + kanamycin (25 ug/mL). This culture, consisting of our integrated and heat-cured  
992 library, was grown overnight at 37 °C and several frozen 2 mL aliquots were made.

993

994 To test the TSS library in the *essQ-cspB* and *ybbD-ylbG* midreplichore regions, the same protocol  
995 was followed using strains engineered with landing pads in these intergenic regions.

996

997 **Library growth and harvest for expression measurements**

998

999 To measure expression of all promoter libraries, libraries were grown and harvested as previously  
1000 described<sup>38</sup> with minor changes to culture conditions.

1001

1002 For each library and biological replicates, a 2 mL frozen aliquot of the library was inoculated in  
1003 200 mL LB (BD#244620) with 25 ug/mL of kanamycin and grown at 30 °C overnight. The  
1004 overnight cultures were used to seed new cultures at OD<sub>600</sub> = .0005 and grown for approximately  
1005 5.5 hours at 30 °C until reaching an OD<sub>600</sub> between = 0.5 and 0.55. The genomic fragment library  
1006 was also grown in Minimal Media (Fisher Scientific #DF0485-17) with 0.2% glucose (g/mL) and  
1007 25 ug/mL of kanamycin for 10 hours at 30 °C until reaching an OD<sub>600</sub> between = 0.5 and 0.55.  
1008 Cultures were rapidly cooled to 0 °C in an ice slurry for two minutes. Three 50 mL aliquots were  
1009 pelleted at 4 °C by centrifugation at 13,000xg for two minutes and the supernatants were poured  
1010 out before snap-freezing the pellets in liquid nitrogen. Three 5 mL aliquots of each library were  
1011 harvested using the same approach to be processed for genomic DNA extractions.

1012

1013

## 1014 **RNA and DNA sequencing library preparation**

1015

1016 RNA was extracted from 50 mL library pellets using a Qiagen RNEasy Midi kit (#75142) and 45  
1017 ug of each extract was concentrated using a Qiagen Minelute Cleanup Kit (#74204). Barcoded  
1018 cDNA was generated from 25 ug of each concentrated RNA extract using Thermo Fisher  
1019 SuperScript IV (#18090010) primed with GU101. The manufacturer's protocol was followed aside  
1020 from extending the reaction time to 1 hour at 52 °C. The cDNA reaction was cleaned using a Zymo  
1021 Research DNA Clean and Concentrator kit (#D40140) before amplification. Barcoded cDNA was  
1022 amplified via PCR for 13 cycles using primers GU59 and GU102. This reaction was cleaned using  
1023 a Zymo Research DNA Clean and Concentrator Kit and 1 uL of this reaction was used in a second  
1024 PCR for indexing and addition of flow cell adapters. The second PCR was for 8 cycles and utilized  
1025 primers GU102 with either GU61, GU62, GU63, or GU64 (which add separate 6 bp indices).

1026

1027 gDNA was extracted from 5 mL cell library pellets using a Qiagen Genra Puregene kit (#158567).  
1028 Barcoded DNA was amplified from 1 ug of gDNA via PCR for 12-15 cycles using primers GU59  
1029 and GU60. The reaction was subsequently cleaned using a Zymo Research DNA Clean and  
1030 Concentrator kit. To add sequencing adapters and indices to the library, 1 ng of this reaction was  
1031 subject to a second PCR for 8 cycles using primers GU70 with either GU63, GU64, GU65, or GU66  
1032 (which add separate 6 bp indices). RNA and DNA sequencing libraries were cleaned using a Zymo  
1033 Research Clean and Concentrator Kit (#D40140) before quantification using an Agilent  
1034 TapeStation.

1035

1036 For each library, eight separate sequencing libraries were prepared: Four sequencing libraries for  
1037 each RNA/DNA with two biological replicates and two technical replicates of each biological  
1038 replicate. Biological replicates originated from separately grown and harvested glycerol stocks of  
1039 each library. For each biological replicate, two RNA/gDNA extractions and sequencing library  
1040 preparations (technical replicates) were performed in parallel. Libraries were submitted to the  
1041 Broad Stem Cell Research Center at UCLA for sequencing on a HiSeq2500 or to the UCLA  
1042 Translational Pathology Core Laboratory for sequencing on a NextSeq500. Raw sequencing data  
1043 and promoter expression measurements are available on NCBI's Gene Expression Omnibus  
1044 (Accession no. GSE144621).

1045

## 1046 **RNA-Seq of MG1655 in M9 minimal Media and Rich LB media**

1047

1048 To compare the promoter landscape to local transcriptional levels, RNA-Seq was performed on  
1049 MG1655 grown in M9 minimal media (BD Difco #248510) supplemented with 0.2% glucose, 2 mM  
1050 magnesium sulfate, and 0.1 mM calcium chloride. Similarly, RNA-Seq was performed for MG1655  
1051 grown in LB (BD#244620). Cells growth and RNA preps were prepared as previously described  
1052 (see methods section titled: library growth and harvest for expression measurements). Samples  
1053 were prepared using an Illumina TruSeq® Stranded mRNA Library Prep (#20020594) following  
1054 manufacturers protocols to achieve strand-specific coverage. We note that no rRNA depletion  
1055 was performed to preserve the fully intact transcriptional landscape. Samples were submitted to  
1056 the UCLA TCGB sequencing core and sequenced on a Hiseq 4000.

## 1057 **Standardizing Promoter Expression Quantification and Activity Thresholding**

1058

1059 We processed the TSS, scramble, and peak tiling libraries using the same computational pipeline  
1060 to facilitate comparisons between libraries. First, we use a set of 96 short synthetic positive  
1061 controls, designed to span a range of activity<sup>40,96</sup>, to fit a robust linear regression (rlm function  
1062 from MASS package) with the TSS library as the reference. Each library is standardized  
1063 independently to the TSS library using the set of positive controls present in both libraries. Next,  
1064 for each library we independently determined the level of background noise based on the median  
1065 of 500 negative controls and subtracted this background from the newly fitted measurements.  
1066 These steps standardize our data so we can train jointly across all datasets.

1067

### 1068 **-10 Motif and -35 Motif characterization**

1069

1070 A position weight matrix from bTSSfinder was used to identify and score the best match to the -  
1071 10 and -35 motifs within active tss-associated promoters, inactive tss-associated promoters, and  
1072 a set of 500 negative controls. Best scores were reported regardless of position within the  
1073 sequence. For all pairwise comparisons of active tss-associated promoters, inactive tss-  
1074 associated promoters, and the negative controls, the distributions of motif scores were compared  
1075 and a student's t-test was performed to determine significance.

1076

### 1077 **Genomic fragment processing, alignment and promoter landscape quantification**

1078

1079 To calculate fragment expression, we used measurements from DNA-seq and RNA-seq and  
1080 excluded fragments with low expression (< 0.1) or high variance (5-fold difference in relative  
1081 expression between biological replicates). To identify the coordinates of genomic fragments  
1082 assayed using the MPRA, fragment sequences were aligned using bowtie2<sup>99</sup> (version 2.3.4.3 ).  
1083 To determine nucleotide-resolution calculations for promoter activity, we utilize the script,  
1084 frag\_expression\_pileup.py. This script outputs WIG files in a strand-specific manner detailing the  
1085 median expression of fragments overlapping each nucleotide position.

1086

### 1087 **Identification of minimal promoter regions**

1088

1089 To identify minimal sequences necessary for promoter activity, contiguous stretches of  
1090 candidate promoter region peak tiles were grouped and the minimal shared overlapping region  
1091 was identified. Peak tiles above the expression threshold were identified and grouped together if  
1092 they shared an overlap of at least 110 bp of their 150 bp total length. The minimal region  
1093 necessary for promoter activity was found by determining the overlap of the outermost  
1094 sequences within a contiguous stretch of tiles.

1095

### 1096 **Determining promoter-gene associations**

1097

1098 To assign genomic promoter peaks to their regulated genes, peaks were first assigned specific  
1099 nucleotide positions by identifying the maximum activity score within a peak. Promoter peaks

1100 were considered intragenic if their maximum scoring nucleotide overlapped with a gene  
1101 coordinate. For peaks whose maximum scoring nucleotides were within intergenic regions,  
1102 regulated genes were assigned by identifying the first downstream gene within 500 bp. Once gene  
1103 associations were identified, promoter peaks were labeled sense or antisense depending on  
1104 whether the regulated gene shared strand orientation with the promoter peak

1105

### 1106 **RNA-Seq alignment and genome transcript coverage**

1107

1108 RNA-Seq analysis was performed using the script *RNAseq\_LB\_processing.sh* or  
1109 *RNAseq\_M9\_processing.sh*. This script trims reads using the trimmomatic software (ver.  
1110 0.36+dfsg-3) and aligned to the MG1655 reference genome (U00096.2) using Hisat2<sup>100</sup> (ver.  
1111 2.1.0-1). Genome nucleotide-resolution coverage was determined using Samtools depth (ver. 1.7-  
1112 1). Meta-analysis across gene groups (as in figure 3B), was performed using Deeptools<sup>101</sup> (ver.  
1113 2.5.6). Gene expression coverage (as in figure 4B) was calculated using custom script  
1114 *wig\_over\_bed.py*, which calculates the total (.wig) coverage across reported *E. coli* genes. In all  
1115 cases, default parameters were used with the exception of allowing for strand-specific  
1116 quantifications.

1117

### 1118 **Amino acid and codon bias within intragenic promoters**

1119

1120 Amino and codon usage was characterized within intragenic promoters and compared to all *E.*  
1121 *coli* coding regions. To identify intragenic promoters, minimal regions necessary for promoter  
1122 activity were identified by cross referencing genomic coordinates to reported genes. Reported  
1123 gene coordinates were acquired from RegulonDB Version 8.0<sup>83</sup>. Once intragenic promoters were  
1124 identified, nucleotide triplets were extracted while conserving the reading frame of the  
1125 overlapping gene. Similarly, nucleotide triplets were extracted from all reported *E. coli* coding  
1126 regions after filtering out sequences which did not have nucleotide lengths of a multiple of three.  
1127 For these extracted sequences, codon frequencies were normalized to their relative abundance  
1128 compared to other codons encoding the same amino acid. Amino acid frequencies were  
1129 normalized to the total number of amino acids within each group. Significantly enriched or  
1130 depleted codons were identified by performing a chi-squared test within each amino acid group  
1131 and adjusting the p-value using FDR. Significantly enriched or depleted amino acids were  
1132 identified by performing a chi-squared test for each amino acid relative to the total pool of amino  
1133 acids and adjusting the p-value using FDR.

1134

### 1135 **Comparison of condition-dependent promoter and gene activation between rich and minimal 1136 media**

1137

1138 To identify condition specific promoters, coordinates of candidate promoter regions identified in  
1139 both M9 and LB conditions were compared to identify overlaps. Coordinates of promoter peaks  
1140 were cross compared between conditions using the bedtools intersect tool (bedtools v2.27.1)  
1141 and considered unique to a particular condition if they had no overlap between conditions. To  
1142 identify regions that were activated between conditions, we compared the relative promoter

1143 activity between conditions at all positions in the genome and identified stretches greater than  
1144 60 bp that exhibited over 2-fold difference in activity. Regions were called using custom script  
1145 run\_differential\_wig.sh available on the Github repository. To identify genes being expressed by  
1146 differentially active regions, intergenic differentially active regions and matched these to the  
1147 nearest downstream gene within 500 bp.

1148

### 1149 **Identification of SEED subsystem annotations enriched in differentially activated genes**

1150

1151 To identify genetic functions associated with condition-dependent genes, the *E. coli* MG1655 K-  
1152 12 genome (Genbank: U00096.2) was annotated using the SEED and RAST webserver<sup>67,68</sup>. Genes  
1153 within 500 bp downstream of promoter regions activated by condition were identified and  
1154 associated with activation in LB or minimal media. For each media condition, genes were grouped  
1155 by functional categories and the number of genes for each category was tallied.

1156

### 1157 **Identification of condition dependent TFBSs**

1158

1159 The TFBS content of promoter peaks unique to each condition was evaluated by cross-  
1160 referencing with TFBSs reported by RegulonDB<sup>83</sup> (Release 8.8). Genomic regions activated in  
1161 each condition were assigned TFBSs based on overlapping genomic coordinates using the  
1162 bedtools intersect tool (bedtools v2.27.1) with default parameters and ignoring strand  
1163 assignments. Incidents of each TFBS overlap were quantified between conditions and normalized  
1164 to incidents per 100,000 bp of promoter peak sequence.

1165

1166

### 1167 **Identification of statistically significant scrambling promoter variants**

1168

1169 We identified scrambling promoter variants that significantly altered expression compared to the  
1170 wild-type (WT) variant in the script scramble\_ttest.Rmd. We considered each scramble and  
1171 barcode combination as an independent observation, rather than summarizing expression as an  
1172 average across all barcodes. A two-sample two-sided Student's t-test (t.test) was performed to  
1173 test for a significant difference in mean expression levels between barcodes for a scrambled  
1174 variant and barcodes for the corresponding WT variant. We performed multiple testing correction  
1175 and identified 1,885 scrambles that increase expression and 5,408 that decrease expression  
1176 relative to the WT variant, at a false discovery rate of 1%.

1177

1178 Next, bedtools merge was used to merge overlapping adjacent scramble variants to produce  
1179 "merged" scrambles. These merged sites correspond to a continuous scrambled region that  
1180 induced significant changes in expression. We identified 1,414 merged scrambles that increased  
1181 expression and 1,903 merged scrambles that decreased expression, and scrambles were merged  
1182 separately based on effect.

1183

1184

1185



## 1186 **Comparison of identified regulatory regions to RegulonDB annotations**

1187

1188 We compared our identified merged scramble sites to existing RegulonDB annotations. We used  
1189 bedtools intersect and required that 10% of the TFBS overlapped with a merged scramble site to  
1190 count as an overlap. Next, we assessed whether the expression effect seen in our MPRA agreed  
1191 with the direction of effect of the TFBS as indicated in RegulonDB. A merged scramble site was  
1192 marked as “concordant” if any of the component scrambles agreed with existing annotation, and  
1193 not concordant otherwise.

1194

## 1195 **Machine learning models**

1196

1197 We implemented several machine learning models, independently trained for both classification  
1198 and regression. All reproducible code is provided in the Github  
1199 ([https://github.com/KosuriLab/ecoli\\_promoter\\_mpra.git](https://github.com/KosuriLab/ecoli_promoter_mpra.git)) and we will briefly describe each model  
1200 and the appropriate parameters or implementation details.

1201

### 1202 *Data processing*

1203

1204 We standardized all datasets as detailed above in “Universal Promoter Expression Quantification  
1205 and Activity Thresholding”. Next, we split our data, using custom scripts, into 75%/25% for  
1206 training/testing based on genomic location, ensuring the splits are equidistant from the origin, to  
1207 avoid overfitting (`define_genome_splits.py`). Briefly, we split the genome into eight chunks, with  
1208 the first and last chunk adjacent to the origin of replication. We designated the second and  
1209 seventh chunk as the test set and remaining chunks as training set. This splitting maintains  
1210 roughly the same distance from the origin between the training and test sets to avoid any potential  
1211 effects of genome location. Many of our library designs include high overlap between adjacent  
1212 positions in the genome. Splitting by genome location mitigates inflated performance due to  
1213 highly similar sequences present in both train and test sets. Across the three libraries (TSS, peak  
1214 tiling, scramble) there are 87,164 training samples and 30,392 test samples.

1215

1216 We trained models for both regression and classification. Our data was skewed toward negative  
1217 examples, with many samples near our determined threshold. For classification, we created a  
1218 buffer around the threshold and only include sequences with expression  $\leq 0.75$  as negatives and  
1219  $\geq 1.25$  as positives and labeled sequences as active or inactive. Our training set was reduced to  
1220 53,326 samples and testing set to 18,567 samples.

1221

1222 We used the classification models to predict probabilities, instead of the class, to derive  
1223 precision-recall curves.

1224

### 1225 *Simple model with promoter features*

1226

1227 For the models in this section we created features only for the TSS library because it is closest to  
1228 endogenous sequence and is a smaller dataset. The training and test sets were split by genomic  
1229 location, as described above, with 13,118 training samples and 4549 testing samples.

1230

1231 We created a simple model which incorporates four features related to promoter function. We  
1232 calculated the maximum position weight matrix (PWM) score using motifs from bTSSfinder<sup>102</sup>  
1233 for both the -10 and -35 core promoter motifs. We scanned the -10 and -35 PWM individually and  
1234 took the max score at any position using scoring functions from the Bioconductor package  
1235 Biostrings<sup>103</sup>. Next, we scanned the sequence with -10 and -35 PWM jointly, allowing either 16, 17,  
1236 or 18bp spacing in between the PWMs, reflecting common spacer lengths between core motifs.  
1237 We assigned the “paired” max score as the max score at any position in the sequence across the  
1238 three length options. Finally, we calculated the GC content (percentage) as this has been shown  
1239 to be negatively correlated with promoter strength<sup>104</sup>. We constructed models in R with these four  
1240 features and fit 1) a linear regression (lm), 2) a linear regression on the log-transformed  
1241 expression values (lm), and 3) a logistic regression (glm, family = ‘binomial’, type = ‘response’).

1242

1243 We trained the gapped k-mer SVM (gkm-SVM<sup>105</sup>) model on only the TSS dataset because the  
1244 model is suited for training sets < 20,000. The training and test sets were split by genome position  
1245 as described above. We specified a word length = 10 with 8 informative columns (L = 10, K = 8).

1246

1247 *K-mer frequencies and simple models (linear regression, logistic regression, partial least squares*  
1248 *regression, partial least squares discriminant analysis)*

1249

1250 All of the models described in the remaining sections were trained using all three combined  
1251 datasets, as described above.

1252

1253 We created a feature set based on k-mer frequencies, with k-mers ranging in length from 3 to 6-  
1254 mers. We generated feature sets and trained models in python. For simpler models we performed  
1255 an additional feature selection step using custom scripts (kmer\_feature\_generator.py).

1256

1257 We trained four models:

- 1258 ● linear regression (statsmodel.api.OLS)
- 1259 ● logistic regression (sklearn.linear\_model.LogisticRegression())
- 1260 ● partial least squares regression (sklearn.cross\_decomposition.PLSRegression())
- 1261 ● partial least squares discriminant analysis  
1262 (sklearn.cross\_decomposition.PLSRegression() on binary dependent variable)

1263

1264 For each k-mer, we computed the frequency in a set of random genomic sequences, the same  
1265 length and size of the training set. We include a k-mer if the absolute correlation with expression  
1266 is greater than the “random” k-mer frequency, resulting in 4800/5440 filtered k-mers. We chose  
1267 partial least squares regression because it projects the input features onto a new space and is  
1268 better equipped to handle a large number of features with high collinearity.

1269 *Random forest regression and classification*

1270

1271 Next, we trained a random forest, for both regression  
1272 (`sklearn.ensemble.RandomForestRegressor()`) and classification  
1273 (`sklearn.ensemble.RandomForestClassifier()`). We train on one-hot encoded DNA as a  
1274 comparison to the neural network model, although random forest is not well suited to categorical  
1275 input features. To compensate for this, we trained the random forest using frequencies of all 6-  
1276 mers and observed improved performance.

1277

1278 *Multi-layer perceptron and neural networks*

1279

1280 We trained a multi-layer perceptron for both regression (`sklearn.neural_network.MLPRegressor()`)  
1281 and classification (`sklearn.neural_network.MLPClassifier()`). MLPs are a class of feedforward  
1282 artificial networks and are “vanilla” neural networks consisting of an input layer, hidden layer, and  
1283 output layer. We used two different feature sets: frequency of all 3- to 6-mers and frequency of  
1284 only 6-mers. Feature sets were standardized with `sklearn.preprocessing.StandardScaler()` to  
1285 remove mean and scale to unit variance. We trained all four models with the following  
1286 parameters: `alpha = 0.005`, `hidden_layer_sizes=(800, 30)`, `solver = 'lbfgs'`, `random_state=1`,  
1287 `max_iter=10000`, `early_stopping=True`, `learning_rate='adaptive'`, `tol=1e-8`.

1288

1289 We trained a convolutional neural network (CNN) on one-hot encoded DNA sequence for both  
1290 regression and classification. We performed hyperparameter tuning and training using <sup>84</sup>, a toolkit  
1291 for working with CNNs built on keras. We performed a random hyperparameter search for a three-  
1292 layer CNN for 100 combinations and the optimal parameters are listed below.

1293

1294 Regression:

- 1295 ● Dropout: 0.1340735187802852
- 1296 ● Pooling width: 16
- 1297 ● Convolutional filter width (for each layer): 16, 17, 18
- 1298 ● Number of filters (for each layer): 19, 39, 54

1299

1300 Classification:

- 1301 ● Dropout: 0.45541334972592196
- 1302 ● Pooling width: 7
- 1303 ● Convolutional filter width (for each layer): 8, 29, 29
- 1304 ● Number of filters (for each layer): 99, 87, 60

1305

1306

1307

1308

1309

1310

1311

1312  
1313  
1314  
1315

- 1316 1. Jacob, F. & Monod, J. Genetic regulatory mechanisms in the synthesis of proteins. *J. Mol.*  
1317 *Biol.* **3**, 318–356 (1961).
- 1318 2. Feklístov, A., Sharon, B. D., Darst, S. A. & Gross, C. A. Bacterial sigma factors: a historical,  
1319 structural, and genomic perspective. *Annu. Rev. Microbiol.* **68**, 357–376 (2014).
- 1320 3. Haugen, S. P., Ross, W. & Gourse, R. L. Advances in bacterial promoter recognition and its  
1321 control by factors that do not bind DNA. *Nat. Rev. Microbiol.* **6**, 507–519 (2008).
- 1322 4. Lee, D. J., Minchin, S. D. & Busby, S. J. W. Activating transcription in bacteria. *Annu. Rev.*  
1323 *Microbiol.* **66**, 125–152 (2012).
- 1324 5. Browning, D. F. & Busby, S. J. W. Local and global regulation of transcription initiation in  
1325 bacteria. *Nat. Rev. Microbiol.* **14**, 638–650 (2016).
- 1326 6. Johnson, X. B. & Hinton, D. M. Escherichia coli RNA polymerase recognition of a  $\sigma$ 70-  
1327 dependent promoter requiring a -35 DNA element and an extended-10 TGN motif. *J.*  
1328 *Bacteriol.* **188**, 8352–8359 (2006).
- 1329 7. Hook-Barnard, I. G. & Hinton, D. M. Transcription initiation by mix and match elements:  
1330 flexibility for polymerase binding to bacterial promoters. *Gene Regul. Syst. Bio.* **1**, 275–293  
1331 (2007).
- 1332 8. Murakami, K. S., Masuda, S., Campbell, E. A., Muzzin, O. & Darst, S. A. Structural basis of  
1333 transcription initiation: an RNA polymerase holoenzyme-DNA complex. *Science* **296**, 1285–  
1334 1290 (2002).
- 1335 9. Liu, B., Hong, C., Huang, R. K., Yu, Z. & Steitz, T. A. Structural basis of bacterial transcription  
1336 activation. *Science* **358**, 947–951 (2017).
- 1337 10. Newberry, K. J. & Brennan, R. G. The structural mechanism for transcription activation by

- 1338 MerR family member multidrug transporter activation, N terminus. *J. Biol. Chem.* **279**,  
1339 20356–20362 (2004).
- 1340 11. Lawson, C. L. *et al.* Catabolite activator protein: DNA binding and transcription activation.  
1341 *Curr. Opin. Struct. Biol.* **14**, 10–20 (2004).
- 1342 12. Kinney, J. B., Murugan, A., Callan, C. G. & Cox, E. C. Using deep sequencing to characterize  
1343 the biophysical mechanism of a transcriptional regulatory sequence. *Proceedings of the*  
1344 *National Academy of Sciences* vol. 107 9158–9163 Preprint at  
1345 <https://doi.org/10.1073/pnas.1004290107> (2010).
- 1346 13. Ishihama, A., Shimada, T. & Yamazaki, Y. Transcription profile of Escherichia coli: genomic  
1347 SELEX search for regulatory targets of transcription factors. *Nucleic Acids Res.* **44**, 2058–  
1348 2074 (2016).
- 1349 14. Peano, C. *et al.* Characterization of the Escherichia coli  $\sigma$ (S) core regulon by Chromatin  
1350 Immunoprecipitation-sequencing (ChIP-seq) analysis. *Sci. Rep.* **5**, 10469 (2015).
- 1351 15. Bonocora, R. P., Smith, C., Lapierre, P. & Wade, J. T. Genome-Scale Mapping of Escherichia  
1352 coli  $\sigma$ 54 Reveals Widespread, Conserved Intragenic Binding. *PLoS Genet.* **11**, e1005552  
1353 (2015).
- 1354 16. Huerta, A. M. & Collado-Vides, J. Sigma70 promoters in Escherichia coli: specific  
1355 transcription in dense regions of overlapping promoter-like signals. *J. Mol. Biol.* **333**, 261–  
1356 278 (2003).
- 1357 17. Rhodius, V. A., Mutalik, V. K. & Gross, C. A. Predicting the strength of UP-elements and full-  
1358 length E. coli  $\sigma$ E promoters. *Nucleic Acids Res.* **40**, 2907–2924 (2012).
- 1359 18. Conway, T. *et al.* Unprecedented High-Resolution View of Bacterial Operon Architecture  
1360 Revealed by RNA Sequencing. *mBio* vol. 5 Preprint at [https://doi.org/10.1128/mbio.01442-](https://doi.org/10.1128/mbio.01442-14)  
1361 14 (2014).
- 1362 19. Thomason, M. K. *et al.* Global transcriptional start site mapping using differential RNA

- 1363 sequencing reveals novel antisense RNAs in Escherichia coli. *J. Bacteriol.* **197**, 18–28  
1364 (2015).
- 1365 20. Gama-Castro, S. *et al.* RegulonDB (version 6.0): gene regulation model of Escherichia coli K-  
1366 12 beyond transcription, active (experimental) annotated promoters and Textpresso  
1367 navigation. *Nucleic Acids Res.* **36**, D120–D124 (2008).
- 1368 21. Belliveau, N. M. *et al.* Systematic approach for dissecting the molecular mechanisms of  
1369 transcriptional regulation in bacteria. *Proc. Natl. Acad. Sci. U. S. A.* **115**, E4796–E4805  
1370 (2018).
- 1371 22. Block, D. H. S., Hussein, R., Liang, L. W. & Lim, H. N. Regulatory consequences of gene  
1372 translocation in bacteria. *Nucleic Acids Res.* **40**, 8979–8992 (2012).
- 1373 23. Sousa, C., de Lorenzo, V. & Cebolla, A. Modulation of gene expression through  
1374 chromosomal positioning in Escherichia coli. *Microbiology* **143 ( Pt 6)**, 2071–2078 (1997).
- 1375 24. Yin, J. *et al.* Effects of chromosomal gene copy number and locations on  
1376 polyhydroxyalkanoate synthesis by Escherichia coli and Halomonas sp. *Appl. Microbiol.*  
1377 *Biotechnol.* **99**, 5523–5534 (2015).
- 1378 25. Kuhlman, T. E. & Cox, E. C. Gene location and DNA density determine transcription factor  
1379 distributions in Escherichia coli. *Mol. Syst. Biol.* **8**, 610 (2012).
- 1380 26. Sendy, B., Lee, D. J., Busby, S. J. W. & Bryant, J. A. RNA polymerase supply and flux through  
1381 the lac operon in Escherichia coli. *Philos. Trans. R. Soc. Lond. B Biol. Sci.* **371**, (2016).
- 1382 27. Scholz, S. A. *et al.* High-Resolution Mapping of the Escherichia coli Chromosome Reveals  
1383 Positions of High and Low Transcription. *Cell Syst* **8**, 212–225.e9 (2019).
- 1384 28. Bryant, J. A., Sellars, L. E., Busby, S. J. W. & Lee, D. J. Chromosome position effects on gene  
1385 expression in Escherichia coli K-12. *Nucleic Acids Res.* **42**, 11383–11392 (2014).
- 1386 29. Brambilla, E. & Sclavi, B. Gene regulation by H-NS as a function of growth conditions  
1387 depends on chromosomal position in Escherichia coli. *G3* **5**, 605–614 (2015).

- 1388 30. Brewster, R. C. *et al.* The transcription factor titration effect dictates level of gene  
1389 expression. *Cell* **156**, 1312–1323 (2014).
- 1390 31. Chen, H., Shiroguchi, K., Ge, H. & Xie, X. S. Genome-wide study of mRNA degradation and  
1391 transcript elongation in Escherichia coli. *Molecular Systems Biology* vol. 11 808–808  
1392 Preprint at <https://doi.org/10.15252/msb.20159000> (2015).
- 1393 32. Esquerre, T. *et al.* Dual role of transcription and transcript stability in the regulation of gene  
1394 expression in Escherichia coli cells cultured on glucose at different growth rates. *Nucleic  
1395 Acids Res.* **42**, 2460–2472 (2013).
- 1396 33. Shearwin, K., Callen, B. & Egan, J. Transcriptional interference – a crash course. *Trends in  
1397 Genetics* vol. 21 339–345 Preprint at <https://doi.org/10.1016/j.tig.2005.04.009> (2005).
- 1398 34. Callen, B. P., Shearwin, K. E. & Egan, J. B. Transcriptional interference between convergent  
1399 promoters caused by elongation over the promoter. *Mol. Cell* **14**, 647–656 (2004).
- 1400 35. Brophy, J. A. N. & Voigt, C. A. Antisense transcription as a tool to tune gene expression.  
1401 *Mol. Syst. Biol.* **12**, 854 (2016).
- 1402 36. Warman, E. A. *et al.* Widespread divergent transcription from bacterial and archaeal  
1403 promoters is a consequence of DNA-sequence symmetry. *Nat Microbiol* **6**, 746–756 (2021).
- 1404 37. Yus, E. *et al.* Transcription start site associated RNAs in bacteria. *Mol. Syst. Biol.* **8**, 585  
1405 (2012).
- 1406 38. Urtecho, G., Tripp, A. D., Insigne, K. D., Kim, H. & Kosuri, S. Systematic Dissection of  
1407 Sequence Elements Controlling  $\sigma_{70}$  Promoters Using a Genomically Encoded Multiplexed  
1408 Reporter Assay in Escherichia coli. *Biochemistry* **58**, 1539–1551 (2019).
- 1409 39. Garcia, H. G. *et al.* Operator sequence alters gene expression independently of transcription  
1410 factor occupancy in bacteria. *Cell Rep.* **2**, 150–161 (2012).
- 1411 40. Mutalik, V. K. *et al.* Precise and reliable gene expression via standard transcription and  
1412 translation initiation elements. *Nat. Methods* **10**, 354–360 (2013).

- 1413 41. Enyeart, P. J. *et al.* Generalized bacterial genome editing using mobile group II introns and  
1414 Cre-lox. *Mol. Syst. Biol.* **9**, 685 (2013).
- 1415 42. Yan, B., Boitano, M., Clark, T. A. & Ettwiller, L. SMRT-Cappable-seq reveals complex operon  
1416 variants in bacteria. *Nat. Commun.* **9**, 3676 (2018).
- 1417 43. Grünberger, F., Ferreira-Cerca, S. & Grohmann, D. Nanopore sequencing of RNA and cDNA  
1418 molecules in. *RNA* **28**, 400–417 (2022).
- 1419 44. Schneider, D. A., Ross, W. & Gourse, R. L. Control of rRNA expression in Escherichia coli.  
1420 *Curr. Opin. Microbiol.* **6**, 151–156 (2003).
- 1421 45. Yona, A. H., Alm, E. J. & Gore, J. Random sequences rapidly evolve into de novo promoters.  
1422 *Nat. Commun.* **9**, 1530 (2018).
- 1423 46. Cho, B.-K., Kim, D., Knight, E. M., Zengler, K. & Palsson, B. O. Genome-scale reconstruction  
1424 of the sigma factor network in Escherichia coli: topology and functional states. *BMC Biol.*  
1425 **12**, 4 (2014).
- 1426 47. Krummel, B. & Chamberlin, M. J. RNA chain initiation by Escherichia coli RNA polymerase.  
1427 Structural transitions of the enzyme in early ternary complexes. *Biochemistry* **28**, 7829–  
1428 7842 (1989).
- 1429 48. Hawley, D. K. & McClure, W. R. Compilation and analysis of Escherichia coli promoter DNA  
1430 sequences. *Nucleic Acids Res.* **11**, 2237–2255 (1983).
- 1431 49. He, W., Jia, C., Duan, Y. & Zou, Q. 70ProPred: a predictor for discovering sigma70 promoters  
1432 based on combining multiple features. *BMC Syst. Biol.* **12**, 44 (2018).
- 1433 50. Weaver, J., Mohammad, F., Buskirk, A. R. & Storz, G. Identifying Small Proteins by Ribosome  
1434 Profiling with Stalled Initiation Complexes. *MBio* **10**, (2019).
- 1435 51. Dornenburg, J. E., Devita, A. M., Palumbo, M. J. & Wade, J. T. Widespread antisense  
1436 transcription in Escherichia coli. *MBio* **1**, (2010).
- 1437 52. Georg, J. & Hess, W. R. cis-antisense RNA, another level of gene regulation in bacteria.



- 1438 *Microbiol. Mol. Biol. Rev.* **75**, 286–300 (2011).
- 1439 53. Güell, M. *et al.* Transcriptome complexity in a genome-reduced bacterium. *Science* **326**,  
1440 1268–1271 (2009).
- 1441 54. Ju, X., Li, D. & Liu, S. Full-length RNA profiling reveals pervasive bidirectional transcription  
1442 terminators in bacteria. *Nat Microbiol* **4**, 1907–1918 (2019).
- 1443 55. Lloréns-Rico, V. *et al.* Bacterial antisense RNAs are mainly the product of transcriptional  
1444 noise. *Sci Adv* **2**, e1501363 (2016).
- 1445 56. Brantl, S. Regulatory mechanisms employed by cis-encoded antisense RNAs. *Curr. Opin.*  
1446 *Microbiol.* **10**, 102–109 (2007).
- 1447 57. Goodman, D. B., Church, G. M. & Kosuri, S. Causes and effects of N-terminal codon bias in  
1448 bacterial genes. *Science* **342**, 475–479 (2013).
- 1449 58. Lamberte, L. E. *et al.* Horizontally acquired AT-rich genes in *Escherichia coli* cause toxicity  
1450 by sequestering RNA polymerase. *Nat Microbiol* **2**, 16249 (2017).
- 1451 59. Singh, S. S. *et al.* Widespread suppression of intragenic transcription initiation by H-NS.  
1452 *Genes Dev.* **28**, 214–219 (2014).
- 1453 60. Bolotin, E. & Hershberg, R. Horizontally Acquired Genes Are Often Shared between Closely  
1454 Related Bacterial Species. *Front. Microbiol.* **8**, 1536 (2017).
- 1455 61. Constantinidou, C. *et al.* A reassessment of the FNR regulon and transcriptomic analysis of  
1456 the effects of nitrate, nitrite, NarXL, and NarQP as *Escherichia coli* K12 adapts from aerobic  
1457 to anaerobic growth. *J. Biol. Chem.* **281**, 4802–4815 (2006).
- 1458 62. Tao, H., Bausch, C., Richmond, C., Blattner, F. R. & Conway, T. Functional Genomics:  
1459 Expression Analysis of *Escherichia coli* Growing on Minimal and Rich Media. *J. Bacteriol.*  
1460 **181**, 6425–6440 (1999).
- 1461 63. Yu, T. C. *et al.* Multiplexed characterization of rationally designed promoter architectures  
1462 deconstructs combinatorial logic for IPTG-inducible systems. *Nat. Commun.* **12**, 325

- 1463 (2021).
- 1464 64. Massé, E. & Gottesman, S. A small RNA regulates the expression of genes involved in iron  
1465 metabolism in *Escherichia coli*. *Proc. Natl. Acad. Sci. U. S. A.* **99**, 4620–4625 (2002).
- 1466 65. Massé, E., Vanderpool, C. K. & Gottesman, S. Effect of RyhB small RNA on global iron use in  
1467 *Escherichia coli*. *J. Bacteriol.* **187**, 6962–6971 (2005).
- 1468 66. Barroga, C. F., Zhang, H., Wajih, N., Bouyer, J. H. & Hermodson, M. A. The proteins encoded  
1469 by the rbs operon of *Escherichia coli*: I. Overproduction, purification, characterization, and  
1470 functional analysis of RbsA. *Protein Science* vol. 5 1093–1099 Preprint at  
1471 <https://doi.org/10.1002/pro.5560050611> (2008).
- 1472 67. Aziz, R. K. *et al.* The RAST Server: rapid annotations using subsystems technology. *BMC*  
1473 *Genomics* **9**, 75 (2008).
- 1474 68. Overbeek, R. *et al.* The SEED and the Rapid Annotation of microbial genomes using  
1475 Subsystems Technology (RAST). *Nucleic Acids Res.* **42**, D206–14 (2014).
- 1476 69. Fang, X. *et al.* Global transcriptional regulatory network for *Escherichia coli* robustly  
1477 connects gene expression to transcription factor activities. *Proc. Natl. Acad. Sci. U. S. A.*  
1478 **114**, 10286–10291 (2017).
- 1479 70. Braun, V. Iron uptake by *Escherichia coli*. *Front. Biosci.* **8**, s1409–21 (2003).
- 1480 71. Lee, J.-W. & Helmann, J. D. Functional specialization within the Fur family of  
1481 metalloregulators. *Biometals* **20**, 485–499 (2007).
- 1482 72. Ireland, W. T. *et al.* Deciphering the regulatory genome of *Escherichia coli*, one hundred  
1483 promoters at a time. (2020) doi:10.7554/eLife.55308.
- 1484 73. Flashner, Y. & Gralla, J. D. Dual mechanism of repression at a distance in the lac operon.  
1485 *Proc. Natl. Acad. Sci. U. S. A.* **85**, 8968–8972 (1988).
- 1486 74. Czarniecki, D., Noel, R. J., Jr & Reznikoff, W. S. The -45 region of the *Escherichia coli* lac  
1487 promoter: CAP-dependent and CAP-independent transcription. *J. Bacteriol.* **179**, 423–429

- 1488 (1997).
- 1489 75. Li, G.-Y., Zhang, Y., Inouye, M. & Ikura, M. Structural mechanism of transcriptional  
1490 autorepression of the Escherichia coli RelB/RelE antitoxin/toxin module. *J. Mol. Biol.* **380**,  
1491 107–119 (2008).
- 1492 76. Grogan, D. W. & Cronan, J. E., Jr. Cloning and manipulation of the Escherichia coli  
1493 cyclopropane fatty acid synthase gene: physiological aspects of enzyme overproduction. *J.*  
1494 *Bacteriol.* **158**, 286–295 (1984).
- 1495 77. Chang, Y. Y. & Cronan, J. E., Jr. Membrane cyclopropane fatty acid content is a major factor  
1496 in acid resistance of Escherichia coli. *Mol. Microbiol.* **33**, 249–259 (1999).
- 1497 78. Ebright, R. H. Transcription activation at Class I CAP-dependent promoters. *Mol. Microbiol.*  
1498 **8**, 797–802 (1993).
- 1499 79. Williams, S. M., Savery, N. J., Busby, S. J. & Wing, H. J. Transcription activation at class I  
1500 FNR-dependent promoters: identification of the activating surface of FNR and the  
1501 corresponding contact site in the C-terminal domain of the RNA polymerase alpha subunit.  
1502 *Nucleic Acids Res.* **25**, 4028–4034 (1997).
- 1503 80. Browning, D. F. & Busby, S. J. The regulation of bacterial transcription initiation. *Nat. Rev.*  
1504 *Microbiol.* **2**, 57–65 (2004).
- 1505 81. Rojo, F. Repression of transcription initiation in bacteria. *J. Bacteriol.* **181**, 2987–2991  
1506 (1999).
- 1507 82. Liu, M., Tolstorukov, M., Zhurkin, V., Garges, S. & Adhya, S. A mutant spacer sequence  
1508 between -35 and -10 elements makes the Plac promoter hyperactive and cAMP receptor  
1509 protein-independent. *Proc. Natl. Acad. Sci. U. S. A.* **101**, 6911–6916 (2004).
- 1510 83. Salgado, H. *et al.* RegulonDB v8.0: omics data sets, evolutionary conservation, regulatory  
1511 phrases, cross-validated gold standards and more. *Nucleic Acids Research* vol. 41 D203–  
1512 D213 Preprint at <https://doi.org/10.1093/nar/gks1201> (2013).

- 1513 84. Paggi, J. *et al.* Predicting Transcriptional Regulatory Activities with Deep Convolutional  
1514 Networks. *bioRxiv* 099879 (2017) doi:10.1101/099879.
- 1515 85. Movva, R. *et al.* Deciphering regulatory DNA sequences and noncoding genetic variants  
1516 using neural network models of massively parallel reporter assays. *PLoS One* **14**, e0218073  
1517 (2019).
- 1518 86. Schmidt, P., Brandt, D., Busche, T. & Kalinowski, J. Characterization of Bacterial  
1519 Transcriptional Regulatory Networks in through Genome-Wide In Vitro Run-Off  
1520 Transcription/RNA-seq (ROSE). *Microorganisms* **11**, (2023).
- 1521 87. Horwitz, M. S. & Loeb, L. A. Promoters selected from random DNA sequences. *Proceedings*  
1522 *of the National Academy of Sciences* vol. 83 7405–7409 Preprint at  
1523 <https://doi.org/10.1073/pnas.83.19.7405> (1986).
- 1524 88. Wolf, L., Silander, O. K. & van Nimwegen, E. Expression noise facilitates the evolution of  
1525 gene regulation. *Elife* **4**, (2015).
- 1526 89. Fitzgerald, D. M., Stringer, A. M., Smith, C., Lapierre, P. & Wade, J. T. Genome-Wide Mapping  
1527 of the Escherichia coli PhoB Regulon Reveals Many Transcriptionally Inert, Intragenic  
1528 Binding Sites. *MBio* **14**, e0253522 (2023).
- 1529 90. LaFleur, T. L., Hossain, A. & Salis, H. M. Automated model-predictive design of synthetic  
1530 promoters to control transcriptional profiles in bacteria. *Nat. Commun.* **13**, 5159 (2022).
- 1531 91. Einav, T. & Phillips, R. How the avidity of polymerase binding to the–35/–10 promoter sites  
1532 affects gene expression. *Proceedings of the National Academy of Sciences* 201905615  
1533 (2019).
- 1534 92. Selvarajoo, K. *Computational Biology and Machine Learning for Metabolic Engineering and*  
1535 *Synthetic Biology*. (Springer Nature, 2022).
- 1536 93. de Boer, C. G. *et al.* Deciphering eukaryotic gene-regulatory logic with 100 million random  
1537 promoters. *Nat. Biotechnol.* (2019) doi:10.1038/s41587-019-0315-8.

- 1538 94. Vaishnav, E. D. *et al.* The evolution, evolvability and engineering of gene regulatory DNA.  
1539 *Nature* **603**, 455–463 (2022).
- 1540 95. Blattner, F. R. *et al.* The complete genome sequence of Escherichia coli K-12. *Science* **277**,  
1541 1453–1462 (1997).
- 1542 96. Kosuri, S. *et al.* Composability of regulatory sequences controlling transcription and  
1543 translation in Escherichia coli. *Proc. Natl. Acad. Sci. U. S. A.* **110**, 14024–14029 (2013).
- 1544 97. Jones, E. M. *et al.* Structural and Functional Characterization of G Protein-Coupled  
1545 Receptors with Deep Mutational Scanning. *bioRxiv* 623108 (2019) doi:10.1101/623108.
- 1546 98. Bushnell, B. BMap short read aligner. (2016).
- 1547 99. Langmead, B. & Salzberg, S. L. Fast gapped-read alignment with Bowtie 2. *Nat. Methods* **9**,  
1548 357–359 (2012).
- 1549 100. Kim, D., Langmead, B. & Salzberg, S. L. HISAT: a fast spliced aligner with low memory  
1550 requirements. *Nat. Methods* **12**, 357–360 (2015).
- 1551 101. Ramírez, F. *et al.* deepTools2: a next generation web server for deep-sequencing data  
1552 analysis. *Nucleic Acids Res.* **44**, W160–5 (2016).
- 1553 102. Shahmuradov, I. A., Mohamad Razali, R., Bougouffa, S., Radovanovic, A. & Bajic, V. B.  
1554 bTSSfinder: a novel tool for the prediction of promoters in cyanobacteria and Escherichia  
1555 coli. *Bioinformatics* **33**, 334–340 (2017).
- 1556 103. Pagès, H., Aboyoun, P., Gentleman, R. & DebRoy, S. Biostrings: Efficient manipulation of  
1557 biological strings. *R package version 2*, (2017).
- 1558 104. Johns, N. I. *et al.* Metagenomic mining of regulatory elements enables programmable  
1559 species-selective gene expression. *Nat. Methods* **15**, 323–329 (2018).
- 1560 105. Ghandi, M. *et al.* gkmSVM: an R package for gapped-kmer SVM. *Bioinformatics* **32**, 2205–  
1561 2207 (2016).

1562

1563

1564
